# Supplementary material
Source: PubMed Central journal article supplement (PMC6205630)
Supplement: NIHMS78895-supplement-Supplementary_Note.pdf [file NIHMS78895-supplement-Supplementary_Note.pdf]

# Supplementary Note

## Materials and Methods

### BioNano optical maps

High molecular weight DNA samples were isolated from mouse kidneys with Plug Lysis protocol according to IrysPrep® Animal Tissue DNA Isolation Soft Tissue User Guide (Protocol 30077). Megabase length genomic DNA which was further cleaned by drop dialysis. Sequence specific labelling was based on 'NLRs' procedure (Protocol 30024), using bspQI as nicking enzyme. Labelling was carried out by a limited drive nick translation process in the presence of a fluorophore-labelled nucleotide. The labelled nicks were repaired to restore strand integrity. The labeled DNA was visualized by the front end user interface software on the Irys Instrument. On average, 250GB of >150kb molecules were collected for each mouse strain. The data were de-novo assembled with the Irysview Software Package v2.5.1, resulting in genome assemblies ranging between 2000 and 5000 contigs, genome sizes of 2.4-2.7GB at 35-80x coverage. A summary of BioNano data is given in Supplementary Table 24.

### Cactus whole genome alignment

The assemblies of each mouse strain were aligned to each other using the rn6 rat assembly as an outgroup with the whole-genome alignment tool progressiveCactus<sup>7</sup>. progressiveCactus makes use of an input phylogenetic guide tree to walk up the tree creating alignments of a few genomes at a time, imputing an ancestral genome at each internal node. This ancestral genome is then used as input to alignments higher on the tree, and in this fashion progressiveCactus progressively builds a reference-free whole-genome alignment between an arbitrary number of genomes. We used progressiveCactus commit e3c60554b3140478cbb9c3783f2288a875487f60 (git tag: msca\_1508) to create the alignment used for the analysis in this paper. The following newick format guide tree was used:

```
(rn6:0.013,(SPRET_EiJ:0.002,(PWK_PhJ:0.001,(CAST_EiJ:0.001,(WSB_EiJ:1e-05,(((NZO_HiLtJ:1e-06,(C57BL_6NJ:1e-06,C57B6J:1e-06)anc1:1e-06)anc2:1e-06,((NOD_ShiLtJ:1e-06,FVB_NJ:1e-06)anc3:1e-06,(((DBA_2J:1e-06,(CBA_J:1e-06,C3H_HeJ:1e-06)anc4:1e-06)anc5:1e-06,AKR_J:1e-06)anc6:1e-06,(BALB_cJ:1e-06,A_J:1e-06)anc7:1e-06)anc8:1e-06)anc9:1e-06)anc10:1e-06,(LP_J:1e-06,129S1_SvImJ:1e-06)anc11:1e-06)anc12:1e-06)anc13:0.0001)anc14:1e-06)anc15:1e-06)anc16:0.045)anc17;
```

The alignment runtime is linear in the number of leaves, if using a binary guide tree, but quadratic if using a star phylogeny. To reduce computation time, the subtree for the lab mice strains was semi-arbitrarily binarized with a branch length of  $1e^{-06}$ . Some prior knowledge of strains and analysis of alignment identity in previous alignment iterations guided the binarization process.

### Mitochondrial genome sequences

Whole genome sequencing produced complete sequences of the mitochondrial genome (mtDNA) for all sixteen inbred strains. Since 1979 when the first complete mouse mtDNA sequence was published<sup>9</sup>, the field has added over 70 mtDNA sequence from mouse strains (n=60), mouse populations, or mouse cell lines. These previous works have set the circular mouse mitochondrial chromosome as between 16,295 and 16,303 bases in length. Regarding the current effort, sequences for fourteen of the strains had been published and deposited in GenBank (<https://www.ncbi.nlm.nih.gov/genbank/>). Strains without a previously published sequence were NZO/HiLtJ and PWK/PhJ. All contigs with alignments to mitochondrial sequence from the mouse reference were collated and - together with read alignments - loaded into gap5<sup>10</sup>. The sequence was manually assessed, corrected and submitted as part of the respective main assembly.

## Submission

All assembly sequences were submitted to Genbank and can be accessed as detailed in (Supplementary Table 18).

### **Repeat analysis**

The pseudo chromosomes were analysed for repeat content using Repeatmasker open-4.0.5 using Crossmatch v0.990329 using the mouse (-species mouse) repeat library (Complete Database: 20140131).

### **Chromosome 11 manual sequence updates**

Manual sequence curation was carried out on chromosome 11. Evidence such as genome mapping data (BioNano), transcript sequence (RefSeq, CCDSs, GENCODE lncRNAs, PacBio cDNAs), BAC/fosmid end sequence, repeat masking, marker placement and self alignments were loaded into the gEVAL<sup>11</sup>, genome editing environment. Manual curation focussed on incomplete genes on chr11 and on severely over-/undersized gaps. Corrections included breaking scaffolds/contigs into smaller components and rearranging components, within and in between chromosomes or unplaced sequence were made.

### **Pseudogene annotation**

We annotated the mouse pseudogenes by combining the results from in-house automatic annotation pipelines (PseudoPipe<sup>18</sup>, RCPedia<sup>19</sup>) with the set obtained by lifting over the manually curated pseudogenes from the reference mouse annotation GENCODE M8 to each individual strain. PseudoPipe is a comprehensive pseudogene annotation pipeline focusing on identifying three pseudogene biotypes: processed duplicated, and unitary pseudogenes. RCPedia is a retrocopy annotation pipeline focused on identifying processed pseudogenes. In order to assure a high level of confidence in the automatic pseudogene predictions, we used as input the consensus protein coding genes between the manually annotated mouse reference genome and each strain. The pseudogenes were identified as described previously<sup>18,19</sup>. Each automatically annotated pseudogene is characterized by transcript biotype, genomic location and exonic structure. Next, we used the transMap lift over of the mouse reference annotation from GENCODE M8 to extract the pseudogenes shared between each strain and the reference genome. As such, we identified between 5,424 and 5,742 pseudogenes in the wild strains (SPRET/EiJ, PWK/PhJ, CAST/EiJ, WSB/EiJ) and over 6,000 pseudogenes in each of the classical strains. We intersected the liftover with the automatic annotation sets requiring at least 1bp overlap. The resulting set was further processed to assure consistency in the parent pseudogenes, biotype and exonic structure. We extend the pseudogene models to assure the maximum overlap between each annotation method. The complete pseudogene set in each strain was constructed as a consensus union between all annotation methods. Thus, the resulting set is defined by 3 confidence levels: Level 1 is indicative of pseudogenes identified by both manual liftover and automatic pipelines, Level 2 is indicative of the pseudogenes annotated only through the liftover of the manual annotation of the reference genome, while Level 3 represents the set of pseudogenes curated only by the automatic annotation workflow. The summary of the pseudogene sets in each strain is available in Supplementary Table 25.

### **Base accuracy**

All of the paired-end sequencing reads from each strain were realigned back to the respective assembled genome using bwa mem v0.7.5, and SNPs and indels identified using samtools v1.2 (mpileup -t DP,DV -C50 -pm3 -F0.2 -d10000) and bcftools v1.2. (call -vm -f GQ). Low quality variants (-sLowQual -e"%QUAL<=10" -g3 -G10) were removed and base error rates for each strain were estimated as total variants (SNPs and indels separately) divided by the size of the respective strain genome assembly.

### **Local structure accuracy**

PCR primer pair sequences were obtained from Yalcin *et al.*<sup>20</sup>, including only primers for structural variants that did not involve an inversion and that uniquely align to the same chromosome and inward orientation on GRCm38. Primer alignments were carried out with bwa mem v0.7.12-r1039 with the following parameters: -A 5 -U 0 -T 10 -k 12. The list of primer pairs and their sequence is given in Supplementary Data 12.

## Unplaced sequences

Summary statistics (e.g. total sequence length, total number, N50) for unplaced scaffolds were calculated for each strain using “Sanger-pathogens/assembly-stats” package (<https://github.com/sanger-pathogens/assembly-stats>) (Supplementary Table 2). Gene annotations for unplaced scaffolds were predicted with CEGMA pipeline<sup>21</sup> (Supplementary Table 3).

## SNP data retrieval

To identify regions of the mouse reference genome (GRCm38) enriched for hSNPs, variation data for each of the 16 strains was retrieved from the MGP variation catalogue version 5<sup>22</sup>. Additionally, sequencing data generated from the C57BL/6J reference strain<sup>23</sup> was aligned back to GRCm38, and heterozygous SNPs identified using the same parameters described by Doran *et al*<sup>24</sup>. All hSNPs identified are relative to GRCm38, and only hSNPs with a genotype quality score  $\geq 20$  were retained for further analysis. For each strain, the total number of heterozygous SNPs available for analysis is contained in Supplementary Table 9. The density of hSNPs in adjacent 200kb windows was calculated and plotted for each strain chromosome (Figure 1b; Supplementary Figure 5).

## Repeat element representation

All pass hSNP dense regions were merged into a single non-overlapping set of regions, enriched for hSNPs, using bedtools<sup>26</sup>. Separately, Repeatmasker v4.0.5 was used to identify all repeat sequences in the GRCm38 assembly of the mouse genome. All identified repeat sequences were then organised into repeat categories defined in Supplementary Data 13. As all hSNP dense region coordinates are based on the GRCm38 reference, repeats for each of the largest classes of categories (LINEs, LTRs, and SINEs) that intersect a hSNP region were identified. Percent divergence (indicative of age) was estimated by Repeatmasker for repeats within hSNP dense regions and compared to the equivalent repeat types, by category, outside of hSNP dense regions using Welch’s Two Sample t-test.

The repeat content (i.e. count of unique repeats) within the merged hSNP dense regions for each of the above repeat categories was then calculated. To examine LINE content enrichment, we simulated the content of LINEs, from GRCm38, with the same set of merged hSNP dense regions by randomly placing those regions on the same chromosome and counting the number of overlapping LINEs (using repeatmasker IDs to uniquely identify overlapping repeats). This was repeated 1,000,000 times, and an Empirical p-value for the observed overlap was obtained by examining the simulated distribution of overlapping LINE counts. The p-value was calculated as the fraction of simulations in which the repeat content was equal to or more extreme than the observed repeat content. This process was repeated for both SINEs and LTRs separately. Calculated p-values less than 0.05 were considered significant, and thus the observed repeat type considered significantly over-represented.

## Targeted reassembly and sequence improvement

Targeted manual reassembly provides advantages over traditional assembly pipelines including improved sequence gap sizing and sequence contiguity (fewer sequence gaps), especially in repeat-rich and low-complexity regions. Manual reassembly and sequence improvement of three loci (IRG, *Nlrp1* and *Sifn*) exhibiting considerable diversity relative to the reference genome was carried out for PWK/PhJ, CAST/EiJ, WSB/EiJ, and SPRET/EiJ. The *Nlrp1* locus of NOD/ShiLtJ was based on a previously published BAC sequence, NT\_187026<sup>27</sup>, which was derived from the NOD/MrkTac strain<sup>28</sup>. Short and long insertion Illumina reads from NOD/ShiLtJ were mapped to NT\_187026 (NOD/MrkTac) with BWA-MEM v0.7.12<sup>29</sup>. Both NOD strains were confirmed to share the same haplotype at the *Nlrp1* locus.

In addition, reassembly and sequence improvement of the *Raet1/H60* locus was carried out for all Collaborative Cross (CC) founder strains (A/J, 129S1/SvImJ, NOD/ShiLtJ, NZO/HILtJ, CAST/EiJ, PWK/PhJ, and WSB/EiJ) excluding the reference strain, C57BL6/J. Based on CISGen Mouse Phylogeny Viewer<sup>30</sup> (<https://msub.csbio.unc.edu/>), it was observed that strains A/J, 129S1/SvImJ and NOD/ShiLtJ share the same haplotype at the *Raet1/H60* locus. Thus only the NOD/ShiLtJ *Raet1/H60* locus reassembly was attempted among these strains. Reassembly and sequence improvement of these loci was carried out for each strain separately, using strain specific

sequencing data generated using whole genome Dovetail Genomics, PacBio RSII, short read Illumina and long-insert (3kb, 6kb and 10kb) paired Illumina (protocols and methods described in previous section). The targeted reassembly pipeline involved two phases. The initial phase involved extracting sequence read data aligned to these regions from the whole genome assembly for each strain. These data were then used to assemble and improve sequence. The improved sequence was then incorporated back into the strain assembly. The pipeline is described and summarised in Supplementary Figure 16.

#### Dovetail *de novo* contigs (DDC)

For each strain, contigs, generated using the Dovetail Genomics *de novo* assembly pipeline, encoding these loci and approximately 100kb up and downstream are extracted. These flanking contigs can be used to anchor reassembled sequence to regions of the genome, before incorporating the improved sequence back into the updated assembly. Extracted Dovetail contigs were masked for repeats and low complexity sequence using Repeatmasker v4.0.5<sup>31</sup>.

#### Merged PacBio Collection (MPC)

BLASTall v.2.2.25<sup>32</sup> was then used to identify strain-specific whole genome PacBio RSII reads mapped to the extracted (and repeat masked) Dovetail contigs. Pacbio reads matched to an extracted contig were retained. In addition, all strain-specific PacBio reads were mapped to the mouse reference genome (GRCm38) using BWA-MEM v0.7.12<sup>29</sup>, and reads uniquely mapped to these loci were also retained. All retained PacBio reads were then mapped back to the extracted Dovetail *de novo* contigs, and, where possible used to fill gaps between contigs. Additionally, these reads were retained for manual sequence improvement.

#### Illumina *de novo* contigs (IDC)

Strain specific Illumina short reads, and their corresponding read-pair mates (mapped or unmapped), mapped to the reference genome (GRCm38) at these loci were extracted. All extracted reads were mapped to the Dovetail assembly contigs using Geneious R8 allowing a maximum of 2% base pair mismatch and up to 3% indels. Extracted reads that failed to map to the Dovetail contigs, and their corresponding mate-pairs (mapped or unmapped), were assembled into short contigs using Geneious R8<sup>33</sup>.

#### Long insertion Illumina collection (LIIC)

Strain-specific long insert (3kb, 6kb and 10kb) Illumina reads mapped to the reference at these loci were extracted, and mapped to the repeat-masked reference (GRCm38) genome. Read pairs where both mates mapped to a repetitive or low complexity region were excluded, and all other mapped read-pairs were retained.

#### Sequence improvement around these four loci

Data extracted above was then used to manually reassemble and improve the region sequence quality surrounding the described loci. The reassembled sequence was then incorporated back into the whole genome assemblies using the steps described below.

Step 1. Beginning with the long-insertion illumina contig reassembly, the Dovetail, Illumina *de novo* and PacBio contigs are manually connected and adjusted into region scaffolds. Size of gaps were estimated using the long-insertion Illumina read-pairs.

Step 2. Illumina reads and Pacbio data were mapped to the adjusted region scaffolds with Geneious R8<sup>33</sup>. Mismatches and conflicts were manually checked, and errors introduced by PacBio long reads were corrected using the Illumina short read data.

Step 3. Reassembled region scaffolds were digested with BspQI restriction endonuclease *in silico* using Knickers 1.5.5<sup>34</sup>. Confirmed BioNano optical map digestion sites were then used to connect individual small scaffolds into a single larger scaffold. Gap-lengths were estimated using the optical map data.

#### Long range PCR (gap filling)

To further fill gaps in the PWK/PhJ strain assembly across the Nlrp1 locus, long range PCR was performed. Unique primer pairs up to 20kb apart were used to generate PCR products, spanning assembly gaps, that were sequenced using PacBio RSII. These sequences were then incorporated into the Nlrp1 region-scaffold for PWK/PhJ generated in step 3 above. Primers and corresponding products are summarized in Supplementary Table 26.

### Fully reassembled sequence availability

Fully reassembled sequences for each locus is available through the European Nucleotide Archive<sup>35</sup>. Accession numbers for each locus are: IRG\_PWK (186Kb, LT629149), Nlrp1\_PWK(325Kb, LT629150), Slfn\_PWK(369Kb, LT629151), Nlrp1\_CAST(395Kb, LT629147), Slfn\_CAST(370Kb, LT629148), IRG\_WSB(215Kb, LT629152), Nlrp\_WSB(394Kb, LT629153) and Slfn\_WSB(322Kb, LT629154). The reassembled IRG locus in CAST/EiJ has previously been published<sup>36</sup>.

### **Olf receptor members in CAST/EiJ**

To assess olfactory gene family differences between the GRCm38 reference genome and the wild-derived CAST/EiJ, the CDS of all olfactory genes annotated in GENCODE vM8 and NCBI's refSeq were extracted and used to search against the CAST/EiJ genome assembly predicted genes using BLASTall<sup>32</sup>. Significant matches ( $E < 10^{-40}$ ) of CAST/EiJ predicted genes to the reference genome were marked as one of:

1. Match: same chromosome and approximate location as GRCm38 reference annotation, same order of adjacent genes and <1% gaps in the CDS.
2. Match with gap: same as match, but >1% gaps in the CDS. Transcriptome sequencing data of CAST/EiJ olfactory sensory neurons<sup>37</sup> was used to manually fill gaps for these genes.
3. Cross: same as match, but the order of adjacent genes is altered.
4. New: no significant match to any GRCm38 annotated genes, or where many CAST/EiJ predicted genes have significant hits to a single GRCm38 gene, all passing non-primary hits are considered novel expansions of the olfr family gene tree, whereas the top matching hit is considered orthologous to the GRCm38 gene and thus not novel. All predicted novel olfr family members were manually confirmed, and compared to previously published CAST/EiJ olfactory gene predictions<sup>37</sup>. In addition, to further identify novel olfr family members, transcriptome sequencing data of CAST/EiJ olfactory sensory neurons was mapped to the CAST/EiJ gene CDS collection. Unmapped reads were *de novo* assembled into contigs, which were then marked as 'new'.
5. Disrupted: partial CDS loss due to genome recombination or the insertion of transposable elements.
6. Fail: GRCm38 genes which have no significant matches identified in CAST/EiJ.
7. Gene loss: For genes marked as fail, CAST/EiJ illumina short reads mapped to the GRCm38 reference at the gene's location were examined for potential gene loss. Confirmed deletions of olfr family members in the CAST/EiJ genome relative to GRCm38 are marked as 'gene loss'

### **High-resolution multicolour fiber-FISH**

Fiber-FISH was used to investigate the underlying genomic structure at the *Raet1* locus across several wild-derived and classical inbred mouse strains. Splenocytes from a C57BL/6J mouse were obtained from the Research Support Facility of the Wellcome Trust Sanger Institute (Cambridge, UK). Embryonic stem cells derived from NOD/ShiLitJ, PWK/PhJ, WSB/EiJ, CAST/EiJ, NZO/HILtJ mice were provided by the The Jackson Laboratory (ME, USA).

To highlight the presence of *Raet1* alleles in these six strains (including C57BL/6J), four fosmid clones, W11-1159J21 (*Raet1*), W11-1794K5 (*H60b*), W11-867J22 (5' flanking region), W11-2748N8 (3' flanking region), were chosen from WIBR-1 mouse Fosmid library as probes in the fibre-FISH validation experiments. For *Nlrp1* locus, three fosmids were chosen: W11-855P1 (red, 3' end of *Nlrp1* alleles), W11-2245E14 (green, 5' end of *Nlrp1* alleles), W11-1427I23 (blue, 5' end of locus) and W11-1254K19 (white, 3' end of locus). No *Nlrp1b* specific fosmid probes can be found because of high repeat density in the region. DNA fibres were prepared from agarose-embedded cells by Molecular Combing (Genomic Vision). The generation of probes by whole genome amplification, and general methods for fibre-FISH are given in detail<sup>38</sup>.

### **Reference genome sequence updates informed by strains**

In order to generate sequence to fill gaps in the reference genome assembly (GRCm38) that rendered genes incomplete, we identified contigs in the C57BL/6NJ assembly that corresponded to the missing sequence by investigating the genome alignments in gEVAL<sup>11</sup>. C57BL/6J reads (PRJNA51977) were aligned to the C57BL/6NJ assembly using bwa mem with default settings. Reads mapping to the previously identified contigs were extracted using bespoke scripts (available upon request) and assembled using geneious 9.1.3<sup>33</sup>. The resulting sequence was compared to (a) the C57BL/6NJ assembly to test for sanity, (b) the reference assembly to confirm overlaps with the existing gap borders, (c) the respective cDNA to identify missing exons and ensure that the generated sequence completes the fragmented gene and (d) to publicly available C57BL/6J assemblies accepted by the Genome Reference Consortium as gap fillers using NCBI Blast Genomes. For regions where (d) didn't lead to suitable alignments, the newly assembled contigs will be submitted and integrated into the reference assembly as described before<sup>39</sup>. If suitable publicly available contigs could be identified, they were validated as described for (a), (b) and (c).

### **GENCODE reference annotation updates informed by strains**

Manual annotation for the whole mouse genome has not yet been completed, so the Augustus predictions were prioritised to those on chromosomes 1- 12, for which manual annotation has been completed. These predictions were further refined to those for which 75% of the introns were novel compared to GENCODE. This gave a subset of 785 predictions which were subject to manual annotation. These predictions were imported so they were viewable as a track within the Otter/Zmap annotation tools on the C57BL/6J reference genome assembly. Predictions were manually assessed and where necessary manual annotation was performed according to the HAVANA guidelines as detailed by the GENCODE project<sup>40</sup>. The annotation decisions that were taken are summarised in Supplementary Data 8.

### **Novel gene structures**

The gene discovered on chromosome 11, was named as “novel protein similar to EF-hand calcium binding domain 13 EFCAB13 (Homo sapiens)”. The majority of the exons were annotated based on RNAseq (Figure 3a) plus limited EST support. Introns 20 and 105 were only supported from the Augustus prediction (see previous section). These exons spliced correctly and were in frame and as such could be annotated according to the HAVANA guidelines:

[ftp://ftp.sanger.ac.uk/pub/project/havana/Guidelines/Guidelines\\_March\\_2016.pdf](ftp://ftp.sanger.ac.uk/pub/project/havana/Guidelines/Guidelines_March_2016.pdf)

with the transcript annotated tagged as having an inferred exon combination. Six additional partial transcripts were also annotated based on EST evidence from C57BL/6J.

### **Standardized Phenotyping Pipeline for Efcab3-like KO mice**

Mice underwent standardized phenotyping from 4 weeks of age, including weight curves, behavioral and morphological assessment at 9 weeks of age, intraperitoneal glucose tolerance test (ipGTT) following a 4h fast at 13 weeks, body composition assessment by dual emission x-ray absorptiometry (DEXA) at 14 weeks of age using a modified version of the MGP pipeline, using a standard chow instead of a high fat diet. At 16 weeks, random-fed mice were anesthetized using 100 mg/kg Ketamine and 10 mg/kg Xylazine and blood was collected retro-orbitally. Death was confirmed by cervical dislocation and heart removal. The standard operating procedures can be found at IMPReSS ([www.mousephenotype.org/impress](http://www.mousephenotype.org/impress)).

Factors thought to affect the variables were standardized as far as possible. Where standardization was not possible, steps were taken to reduce potential bias. For example, the impact of different people completing the experiment was minimized (“minimized operator”) as defined in the Mouse Experimental Design Ontology (MEDO)<sup>44</sup> as “The process by which steps are taken to minimize the potential differences in the effector by training and monitoring of operator.”

<http://bioportal.bioontology.org/ontologies/MEDO/?p=summary>

The data captured with the MEDO ontology can be accessed at <http://www.mousephenotype.org/about-impc/arrive-guidelines>

In addition, pre-set reasons were established for QC failures (e.g. insufficient sample) and detailed within IMPRESS. Data can only be QC failed from the dataset if clear technical reasons can be found for a measurement being an outlier. For mouse management purposes, the cages have both genotype and allele information, therefore the *in-vivo* screens are run unblinded. However the analysis of blood samples for clinical chemistry and haematological assessment were run blind using a barcode system. In addition, as a high-throughput screen where genes are selected for study without hypothesis and mice are studied in multiple batches, there is limited room for personal bias to influence the results. The 7 male and 8 female *Efcab3* homozygotes which entered the pipeline were tested in 6 batches (1 batch of 3 males, 1 batch of 2 males, 1 batch of 1 male and 3 females, 1 batch of 2 females, 1 batch of 1 male and 1 batch of 3 females). No mutant mice were lost during the pipeline for health or welfare reasons. With each batch of mice, a cohort of 7 age and sex matched wild-type C57BL/6NTac mice were also phenotyped. Viability of the line is assessed by genotyping a minimum of 28 offspring from heterozygous intercrosses. For *Efcab3*<sup>em1(IMPC)Wtsi</sup>, this gave 11 homozygous mice from 34 offspring (Fisher- exact test, P=0.59). Mice were allocated to the pipeline randomly by Mendelian Inheritance.

- Weekly Weights

From 4-16 weeks of age, the mice were weighed once a week to generate a growth curve. On weeks with other testing, the weights are taken during the test in order to minimize handling and disturbing of the mice. With the ipGTT test, the weight was taken prior to the 4h fast. On weeks without testing, the mice were weighed in the animal holding room.

- Neurological and Morphological Phenotyping Assessment

At 9 weeks of age mice are assessed for gross behavioural abnormalities using a modified SHIRPA screen and their whole body morphology is examined using a standardised checklist.

- Glucose Tolerance Test

At 13 week of age, mice were singly housed and fasted for 4h after which approximately 0.5mm of the tail tip was removed with a scalpel blade and a fasting blood sample was taken. Mice were then given an intraperitoneal injection with 2g/kg glucose and further blood samples were taken at 15, 30, 60 and 120 min post-glucose injection. Blood glucose concentration were measured using Accu-chek Aviva glucose meters (Roche, Basel, Switzerland).

- DEXA

At 14 weeks of age, mice were anaesthetised with isoflurane (IsoFlo, Zoetis, UK). Body composition [fat mass (g), fat percentage estimate (%), lean mass (g), bone mineral density (g/cm<sup>2</sup>) & bone mineral content (g)] were measured using an Ultrafocus 100 (Faxitron, Tucson, AZ, USA). Nose to tail base length measurements were performed using a ruler with 1mm graduations after DEXA measurements. An internal calibration process was performed on the Ultrafocus 100 before each imaging session.

- Blood Sample & Tissue Collection

At 16 weeks of age, blood was collected without pre-fasting by retro-orbital sinus puncture under terminal anaesthesia (100mg/kg Ketamine and 10mg/kg Xylazine, i.p.) between 08:00 and 10:30 hours. 100 µl of blood was collected into EDTA-coated paediatric tubes (Kabe Labortechnik GmbH, Numbrecht, Germany) for standard haematological analysis and flow cytometric analysis of peripheral blood leukocytes. The rest (~800 µl) was collected into heparinised paediatric tubes (Kabe Labortechnik) for plasma clinical chemistry analysis and insulin assay (MRC-CORD Mouse Biochemistry Laboratory). Selected tissues were then collected for either the Sanger Biobank or further analysis performed by external collaborators specializing in a particular organ.

- Laboratory Analyses

Within 1 hour of collection, heparinised whole blood samples were centrifuged at 5000 rcf for 10 minutes at 8°C, the plasma removed and stored at 4°C until analysis. For clinical chemistry, plasma was assessed at 37°C for standard parameters on an Olympus AU400 analyser using kits

and controls supplied by Beckman Coulter. Samples were also tested for haemolysis (Bernardi et al. 1996). Four parameters were measured on the Olympus AU400 analyser by kits not supplied by Beckman Coulter: non-esterified free fatty acids (NEFAC - Wako Chemical Inc., Richmond, USA), glycerol (Randox Laboratories Ltd., UK) (Champy et al. 2004), fructosamine (Roche Diagnostic, UK) and thyroxine (Thermo Fisher, MA, USA).

An automated electrical impedance cell counter was used to perform white blood cell counts (WBC ( $\times 10^3/\mu\text{l}$ )), red blood cell counts (RBC ( $\times 10^6/\mu\text{l}$ )), red blood cell distribution width (RDW(%)), haematocrit (HCT (%)), mean cell volume (MCV (fl)), mean corpuscular haemoglobin (MCH (pg)), mean corpuscular haemoglobin concentration (MCHC (g/dl)), platelet counts (PLT ( $\times 10^3/\mu\text{l}$ )) and mean platelet volume (MPV (fl)) measurements, whilst haemoglobin (HGB (g/dl)) was measured by spectrophotometry (Scil Vet abc+, Viernheim, Germany). Internal quality controls were run on a daily basis and external quality controls, assessed on a two weekly interval, were done by the RIQAS scheme (Randox, UK).

Whole blood is stained with two titrated cocktails of antibodies. Panel 1 containing CD45, TCRab, TCRgd, CD161, CD4, CD8, CD25, CD44, CD62L and KLRG1. Panel 2 containing CD45, CD19, IgD, Ly6B, Ly6G, Ly6C, CD11b and I-A/I-E. Samples are fixed and red blood cells lysed prior to acquisition on a BD LSR II flow cytometer after running automated compensation using compbeads and BD FACSDiva software. Data is analysed using FlowJo after singlet doublet discrimination, a time gate is used to exclude HTS issues and leukocytes identified with a SSC and CD45 gate.

- Statistical Analysis

A high throughput pipeline with multiple analyses and types of phenotyping data means that a single power calculation is inappropriate. Instead, the pipeline has been developed through empirically by selection of a workflow which balances rate of phenotype discovery with cost effectiveness. For phenotyping analysis, the individual mouse was considered the experimental unit within the studies. Statistical tests performed to compare genotype means, with sex as a covariate. For continuous data, an iterative top down mixed modelling strategy was performed as described in<sup>45</sup>, using PhenStat version 2.8.0, an R package freely available from Bioconductor<sup>46</sup>. The package's mixed model framework was used, and all analysis was performed by setting the argument equation to "withoutWeight" (Eq. 1) and dataPointsThreshold was set to 2. Insulin data was log-transformed prior to analysis. The model optimisation implemented will adjust for unequal variances. The genotype contribution test p value was adjusted for multiple testing to control the false discovery rate to 5%.

$$Y \sim \text{Genotype} + \text{Sex} + \text{Genotype} * \text{Sex} + (1|\text{Batch}) \quad [\text{Eq. 1}]$$

For the categorical data, a Fisher Exact Test was fitted comparing the proportions seen between wildtype and knockout mice for each sex independently using PhenStat FE Framework with the default setting. The minimum p value returned from the two tests for a variable was adjusted for multiple testing to control the false discovery rate to 5%.

## References

1. Park, N. *et al.* An improved approach to mate-paired library preparation for Illumina sequencing. *Methods Gener. Seq.* **1**, (2013).
2. Putnam, N. H. *et al.* Chromosome-scale shotgun assembly using an in vitro method for long-range linkage. *Genome Res.* **26**, 342–350 (2016).
3. Kirby, A. *et al.* Fine mapping in 94 inbred mouse strains using a high-density haplotype resource. *Genetics* **185**, 1081–1095 (2010).
4. Li, H. *et al.* The Sequence Alignment/Map format and SAMtools. *Bioinforma. Oxf. Engl.* **25**, 2078–2079 (2009).
5. Simpson, J. T. & Durbin, R. Efficient de novo assembly of large genomes using compressed data structures. *Genome Res.* **22**, 549–556 (2012).
6. Luo, R. *et al.* SOAPdenovo2: an empirically improved memory-efficient short-read de novo assembler. *GigaScience* **1**, 18 (2012).
8. Paten, B. *et al.* Cactus: Algorithms for genome multiple sequence alignment. *Genome Res.* **21**, 1512–1528 (2011).
9. Kolmogorov, M. *et al.* Chromosome assembly of large and complex genomes using multiple references. (2016). doi:10.1101/088435
10. Martens, P. A. & Clayton, D. A. Mechanism of mitochondrial DNA replication in mouse L-cells: localization and sequence of the light-strand origin of replication. *J. Mol. Biol.* **135**, 327–351 (1979).



11. Bonfield, J. K. & Whitwham, A. Gap5--editing the billion fragment sequence assembly. *Bioinforma. Oxf. Engl.* **26**, 1699–1703 (2010).
12. Chow, W. *et al.* gEVAL - a web-based browser for evaluating genome assemblies. *Bioinforma. Oxf. Engl.* **32**, 2508–2510 (2016).
13. Stanke, M., Diekhans, M., Baertsch, R. & Haussler, D. Using native and syntenically mapped cDNA alignments to improve de novo gene finding. *Bioinforma. Oxf. Engl.* **24**, 637–644 (2008).
14. Stanke, M., Schöffmann, O., Morgenstern, B. & Waack, S. Gene prediction in eukaryotes with a generalized hidden Markov model that uses hints from external sources. *BMC Bioinformatics* **7**, 62 (2006).
15. König, S., Romoth, L. W., Gerischer, L. & Stanke, M. Simultaneous gene finding in multiple genomes. *Bioinforma. Oxf. Engl.* **32**, 3388–3395 (2016).
16. Mudge, J. M. & Harrow, J. Creating reference gene annotation for the mouse C57BL6/J genome assembly. *Mamm. Genome Off. J. Int. Mamm. Genome Soc.* **26**, 366–378 (2015).
17. Dobin, A. *et al.* STAR: ultrafast universal RNA-seq aligner. *Bioinforma. Oxf. Engl.* **29**, 15–21 (2013).
18. Kent, W. J. BLAT--the BLAST-like alignment tool. *Genome Res.* **12**, 656–664 (2002).
19. Zhang, Z. *et al.* PseudoPipe: an automated pseudogene identification pipeline. *Bioinforma. Oxf. Engl.* **22**, 1437–1439 (2006).
20. Navarro, F. C. P. & Galante, P. A. F. RCPedia: a database of retrocopied genes. *Bioinforma. Oxf. Engl.* **29**, 1235–1237 (2013).
21. Yalcin, B. *et al.* The fine-scale architecture of structural variants in 17 mouse genomes. *Genome Biol.* **13**, R18 (2012).
22. Parra, G., Bradnam, K. & Korf, I. CEGMA: a pipeline to accurately annotate core genes in eukaryotic genomes. *Bioinforma. Oxf. Engl.* **23**, 1061–1067 (2007).
23. Keane, T. M. *et al.* Mouse genomic variation and its effect on phenotypes and gene regulation. *Nature* **477**, 289–294 (2011).
24. Gnerre, S. *et al.* High-quality draft assemblies of mammalian genomes from massively parallel sequence data. *Proc. Natl. Acad. Sci. U. S. A.* **108**, 1513–1518 (2011).
25. Doran, A. G. *et al.* Deep genome sequencing and variation analysis of 13 inbred mouse strains defines candidate phenotypic alleles, private variation and homozygous truncating mutations. *Genome Biol.* **17**, 167 (2016).
26. Mi, H., Muruganujan, A. & Thomas, P. D. PANTHER in 2013: modeling the evolution of gene function, and other gene attributes, in the context of phylogenetic trees. *Nucleic Acids Res.* **41**, D377–386 (2013).
27. Quinlan, A. R. BEDTools: The Swiss-Army Tool for Genome Feature Analysis. *Curr. Protoc. Bioinforma.* **47**, 11.12.1–34 (2014).
28. Steward, C. A. *et al.* Genome-wide end-sequenced BAC resources for the NOD/MrkTac() and NOD/ShiLtJ() mouse genomes. *Genomics* **95**, 105–110 (2010).
29. Makino, S. *et al.* Breeding of a non-obese, diabetic strain of mice. *Jikken Dobutsu* **29**, 1–13 (1980).
30. Li, H. & Durbin, R. Fast and accurate long-read alignment with Burrows-Wheeler transform. *Bioinforma. Oxf. Engl.* **26**, 589–595 (2010).
31. Wang, J. R., de Villena, F. P.-M. & McMillan, L. Comparative analysis and visualization of multiple collinear genomes. *BMC Bioinformatics* **13 Suppl 3**, S13 (2012).
32. Tarailo-Graovac, M. & Chen, N. Using RepeatMasker to identify repetitive elements in genomic sequences. *Curr. Protoc. Bioinforma.* **Chapter 4**, Unit 4.10 (2009).
33. Camacho, C. *et al.* BLAST+: architecture and applications. *BMC Bioinformatics* **10**, 421 (2009).
34. Kears, M. *et al.* Geneious Basic: an integrated and extendable desktop software platform for the organization and analysis of sequence data. *Bioinforma. Oxf. Engl.* **28**, 1647–1649 (2012).
35. Shelton, J. M. *et al.* Tools and pipelines for BioNano data: molecule assembly pipeline and FASTA super scaffolding tool. *BMC Genomics* **16**, 734 (2015).
36. Toribio, A. L. *et al.* European Nucleotide Archive in 2016. *Nucleic Acids Res.* **45**, D32–D36 (2017).
37. Lilue, J., Müller, U. B., Steinfeldt, T. & Howard, J. C. Reciprocal virulence and resistance polymorphism in the relationship between *Toxoplasma gondii* and the house mouse. *eLife* **2**, e01298 (2013).
38. Ibarra-Soria, X. *et al.* Variation in olfactory neuron repertoires is genetically controlled and environmentally modulated. *eLife* **6**, (2017).
39. Ersfeld, K. Fiber-FISH: fluorescence in situ hybridization on stretched DNA. *Methods Mol. Biol. Clifton NJ* **270**, 395–402 (2004).
40. Schneider, V. A. *et al.* Evaluation of GRCh38 and de novo haploid genome assemblies demonstrates the enduring quality of the reference assembly. *Genome Res.* **27**, 849–864 (2017).
41. Harrow, J. *et al.* GENCODE: the reference human genome annotation for The ENCODE Project. *Genome Res.* **22**, 1760–1774 (2012).
42. Skarnes, W. C. *et al.* A conditional knockout resource for the genome-wide study of mouse gene function. *Nature* **474**, 337–342 (2011).
43. Boroviak, K., Doe, B., Banerjee, R., Yang, F. & Bradley, A. Chromosome engineering in zygotes with CRISPR/Cas9: Chromosome Engineering in Zygotes with CRISPR/Cas9. *genesis* **54**, 78–85 (2016).
44. Hodgkins, A. *et al.* WGE: a CRISPR database for genome engineering: Fig. 1. *Bioinformatics* **31**, 3078–3080 (2015).

45. Tyler-Smith, C. *et al.* Where Next for Genetics and Genomics? *PLoS Biol.* **13**, e1002216 (2015).
46. Kurbatova, N., Mason, J. C., Morgan, H., Meehan, T. F. & Karp, N. A. PhenStat: A Tool Kit for Standardized Analysis of High Throughput Phenotypic Data. *PLOS ONE* **10**, e0131274 (2015).
47. Gentleman, R. C. *et al.* Bioconductor: open software development for computational biology and bioinformatics. *Genome Biol.* **5**, R80 (2004).
48. Mikhaleva, A., Kannan, M., Wagner, C. & Yalcin, B. Histomorphological Phenotyping of the Adult Mouse Brain. *Curr. Protoc. Mouse Biol.* **6**, 307–332 (2016).
49. Paxinos, G. & Franklin, K. B. J. *The Mouse Brain in Stereotaxic Coordinates*, 3rd ed. (Academic Press, 2007).

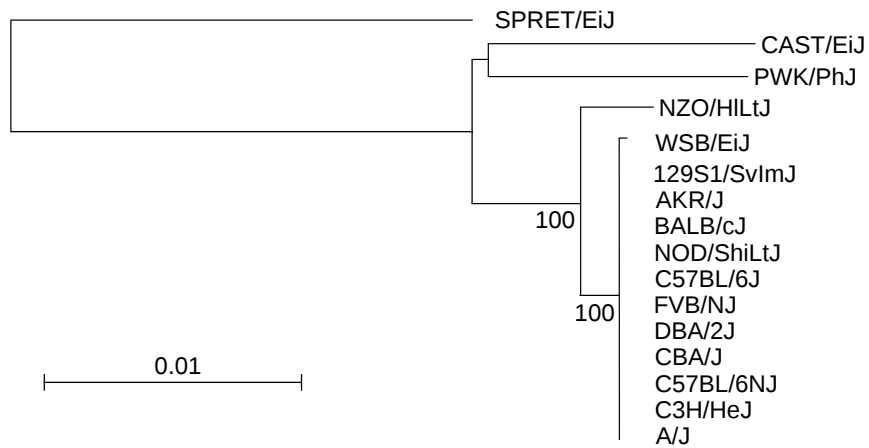

**Supplementary Figure 1: Molecular Phylogenetic analysis of the mouse reference and 16 strain mitochondrial sequences.** The evolutionary history was inferred by using the Maximum Likelihood method based on the Tamura-Nei model. Codon positions included were 1st+2nd+3rd+Noncoding. All positions containing gaps and missing data were eliminated. Bootstraps were shown if >90.

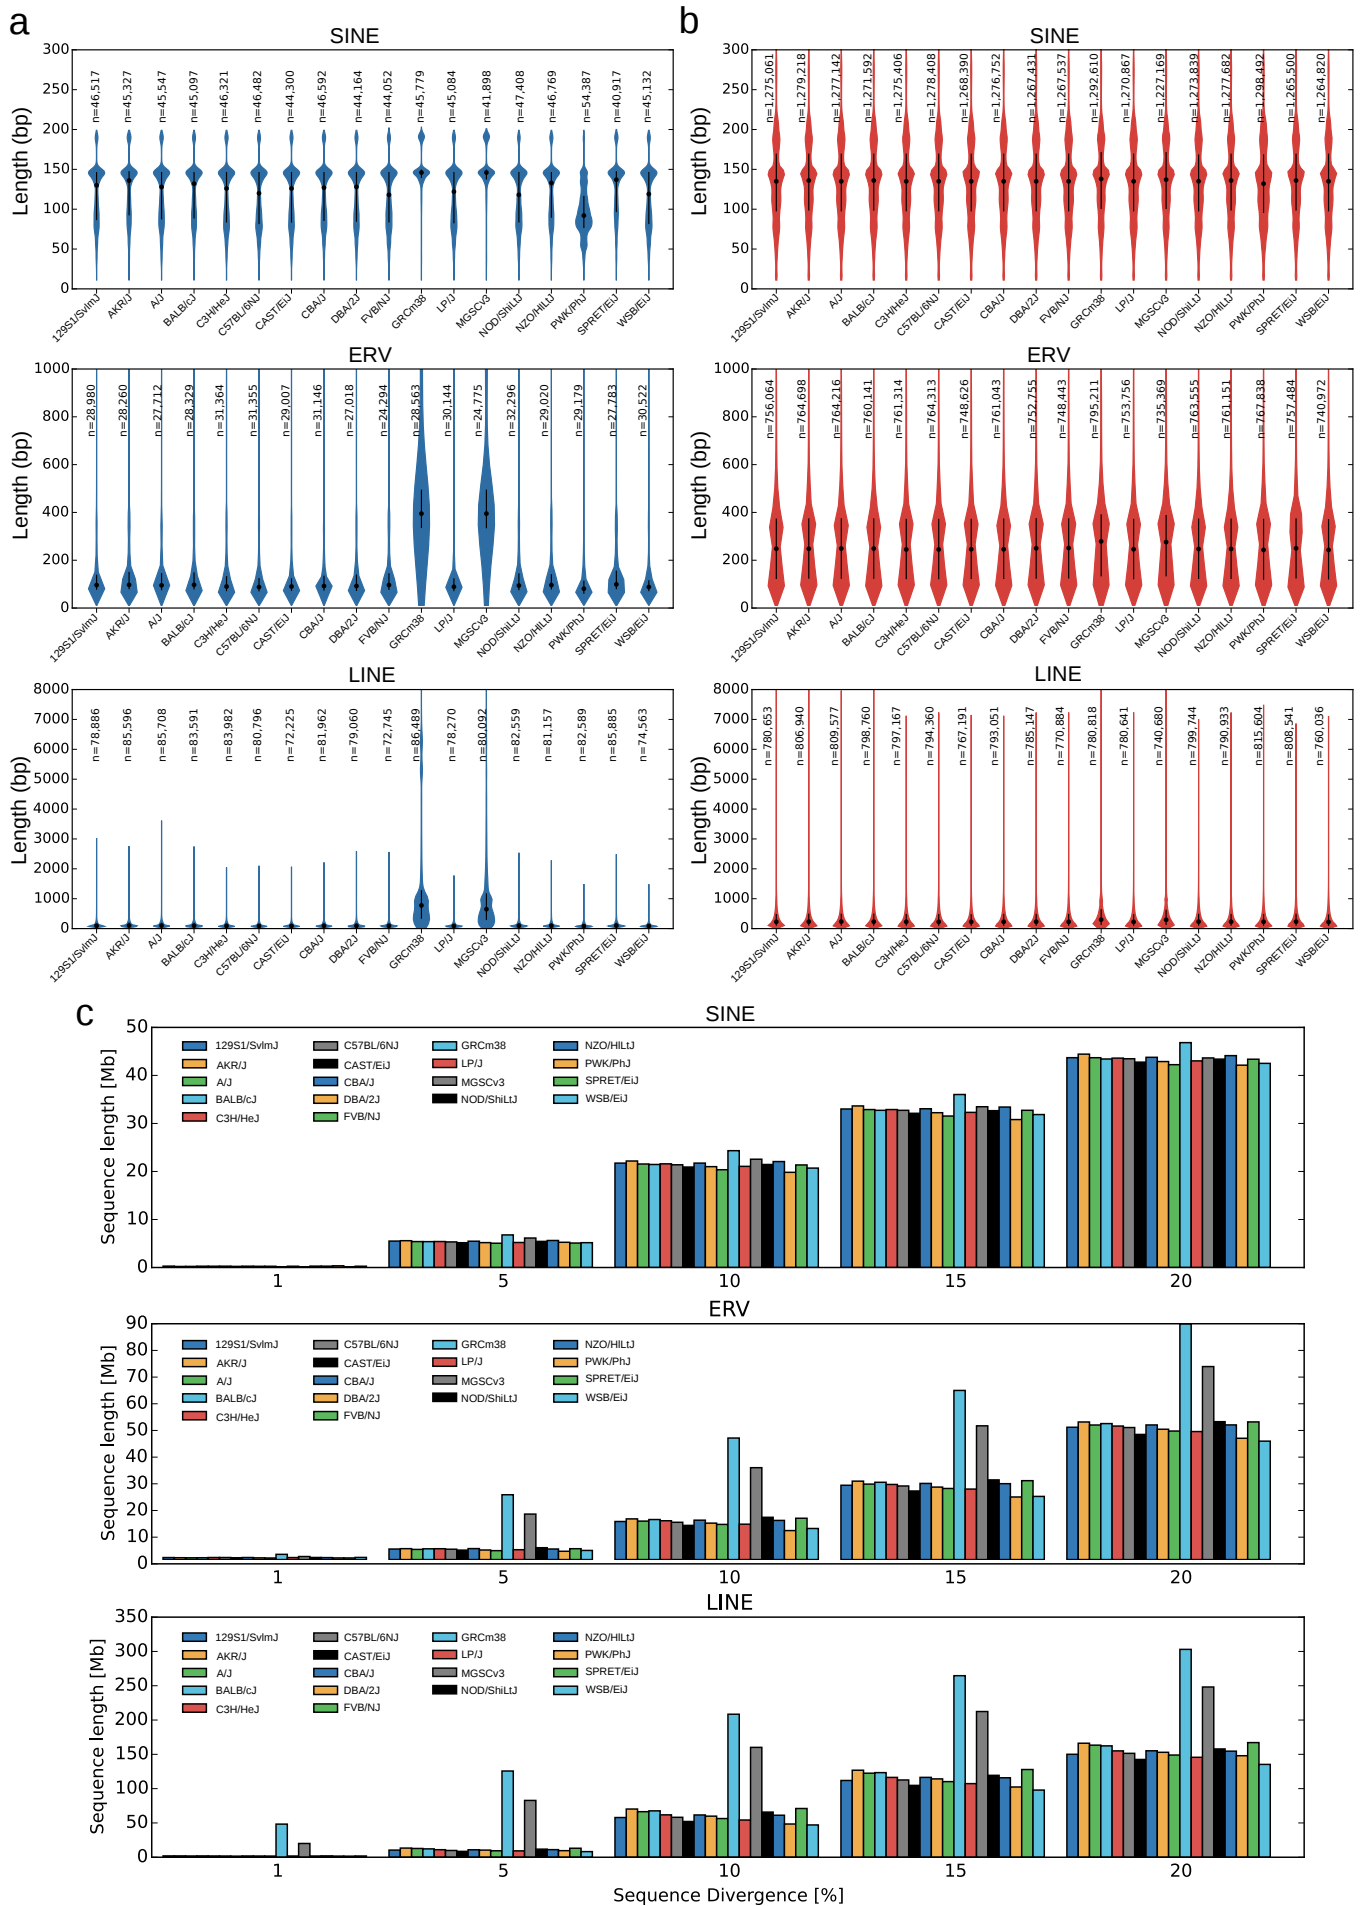

**Supplementary Figure 2: Repeat elements in assembly.** (a) Amount of sequence for SINE, LINE, and ERV elements in the strain assemblies, MGSCv3, and GRCm38 at less than 5% sequence divergence. Black bars show 25th and 75th percentile, dot indicate the median value. (b) Total sequence for SINE, LINE, and ERV elements in the strain assemblies, MGSCv3, and GRCm38. Black bars show 25th and 75th percentile, dot indicate the median value. (c) Total sequence for SINE, LINE, and ERV elements at 5-20% divergence levels or less according to Repeatmasker annotations.

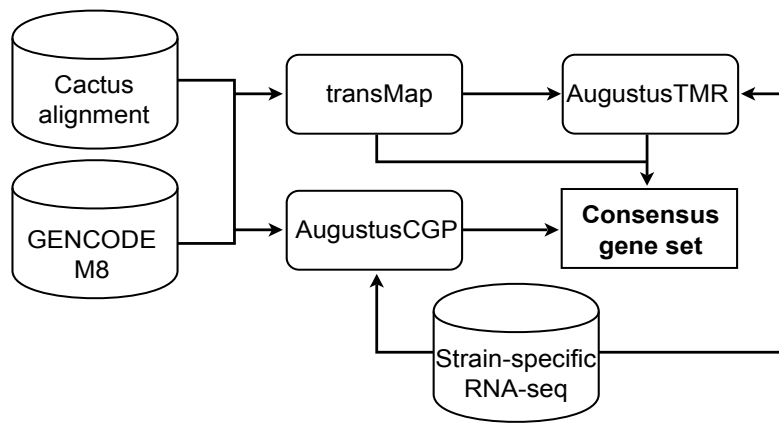

**Supplementary Figure 3: Annotation pipeline.** Comparative annotation flowchart with three inputs: ProgressiveCactus whole-genome alignment of all of the strains, the GENCODE M8, and a database of strain-specific RNA-seq splice junctions and expression estimates. These input to TransMap, AugustusTMR and AugustusCGP (see methods). The transcript sets output by each mode are then combined by a consensus finding algorithm into a strain specific annotation set.

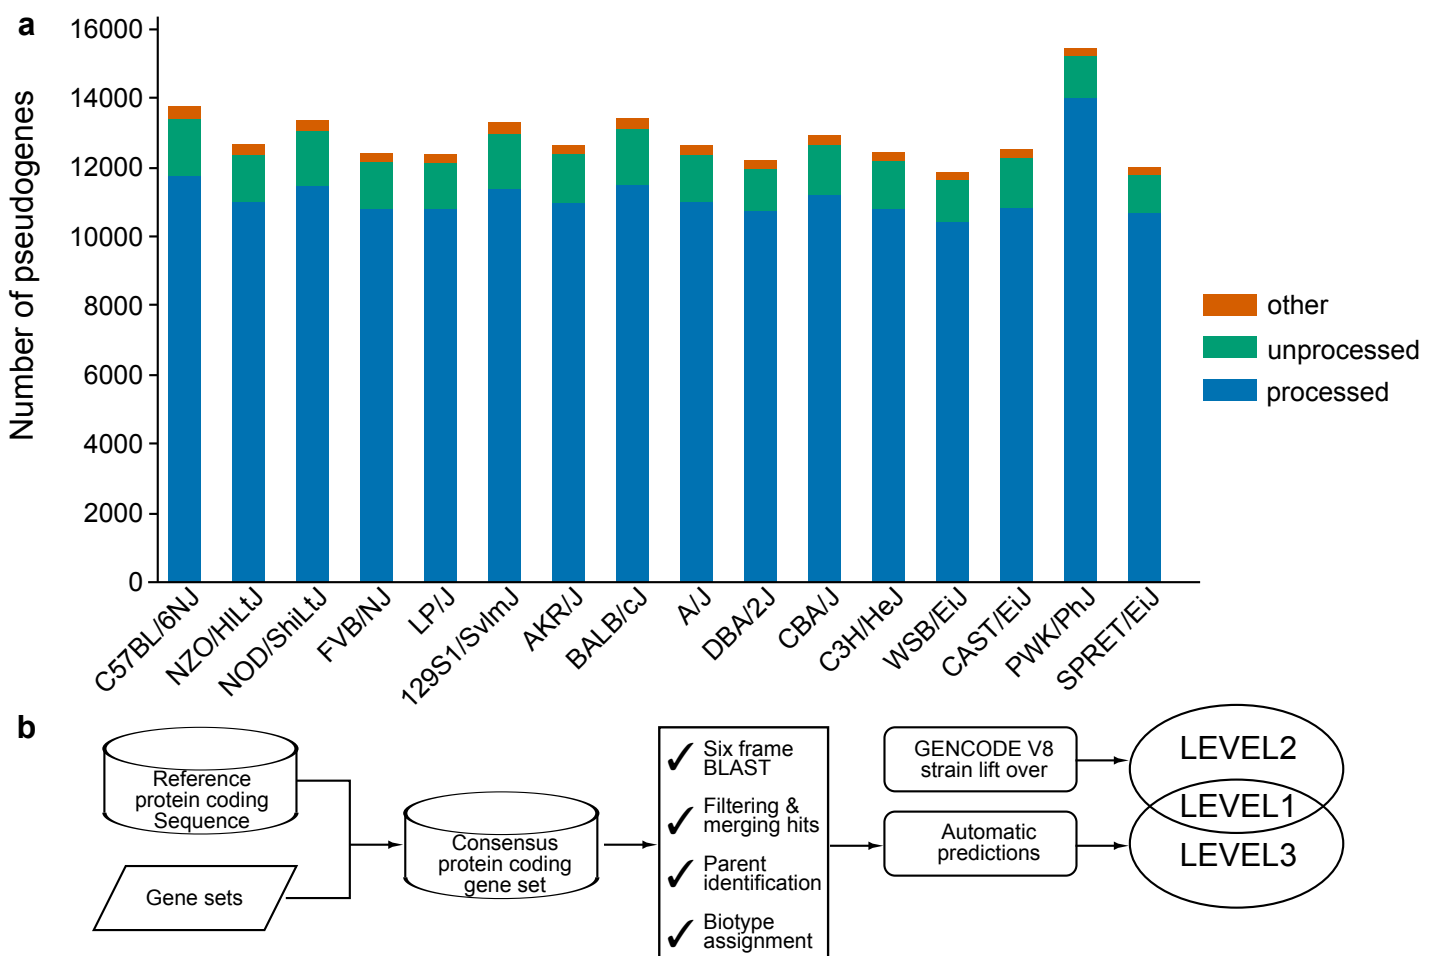

**Supplementary Figure 4:** (a) The number of pseudogenes predicted by our annotation pipeline for each assembly is broken down by type. Processed pseudogenes are a result of a retrotransposition event, and consequently the introns have been spliced out resulting in a monoexon-like structure. Unprocessed pseudogenes have been formed through a duplication process and follow closely the intron-exon structure of their functional homolog. A smaller number of pseudogenes are related to immune-system related genes while another small fraction of pseudogenes could not be assigned a definite biotype. These cases are grouped under the “Other” category. The number of pseudogenes predicted per genome is roughly ~13,000, with slightly smaller numbers for more distant strains (e.g. *Mus spretus*, *M. m. castaneus*). (b) The corresponding peptides are subjected to a six-frame BLAST against the strain genome to identify homologous loci that have not been previously annotated. Each potential match is checked for a number of disablements such as insertions, deletions, stop codons and frame-shifts. The annotated pseudogene set is intersected with the previously identified pseudogenes by lifting over the manual annotation to each strain genome. The result is a 3-tier confidence hierarchy, where level 1 refers to pseudogenes annotated by both automatic means and lift over of manual annotation, level 2 focuses on pseudogenes identified only by lifting over the manually annotated GENCODE pseudogenes, and level 3 is composed of only automatically annotated pseudogenes.



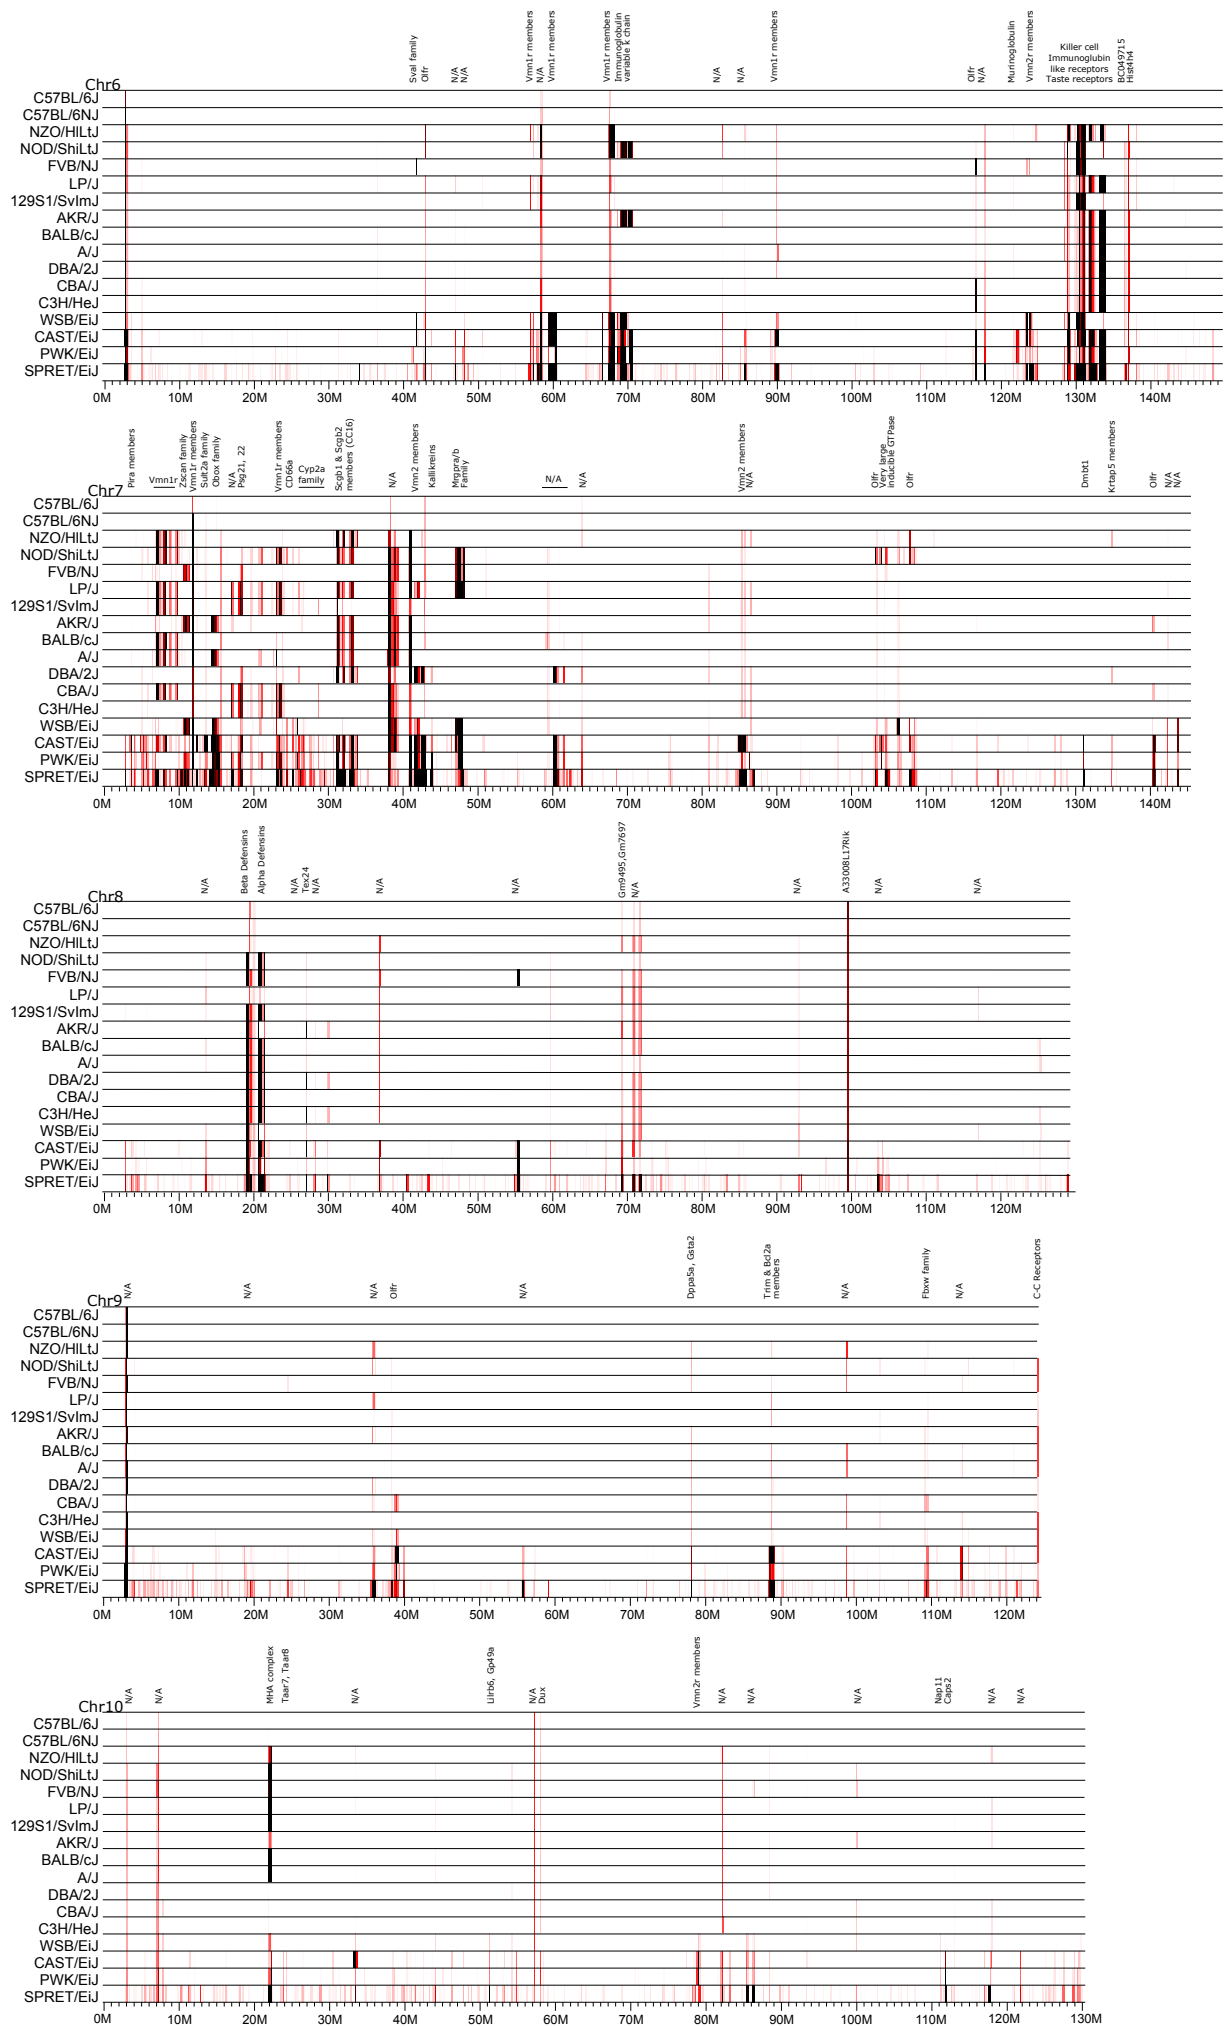

Supplementary Figure 5 (to be continued on next page)

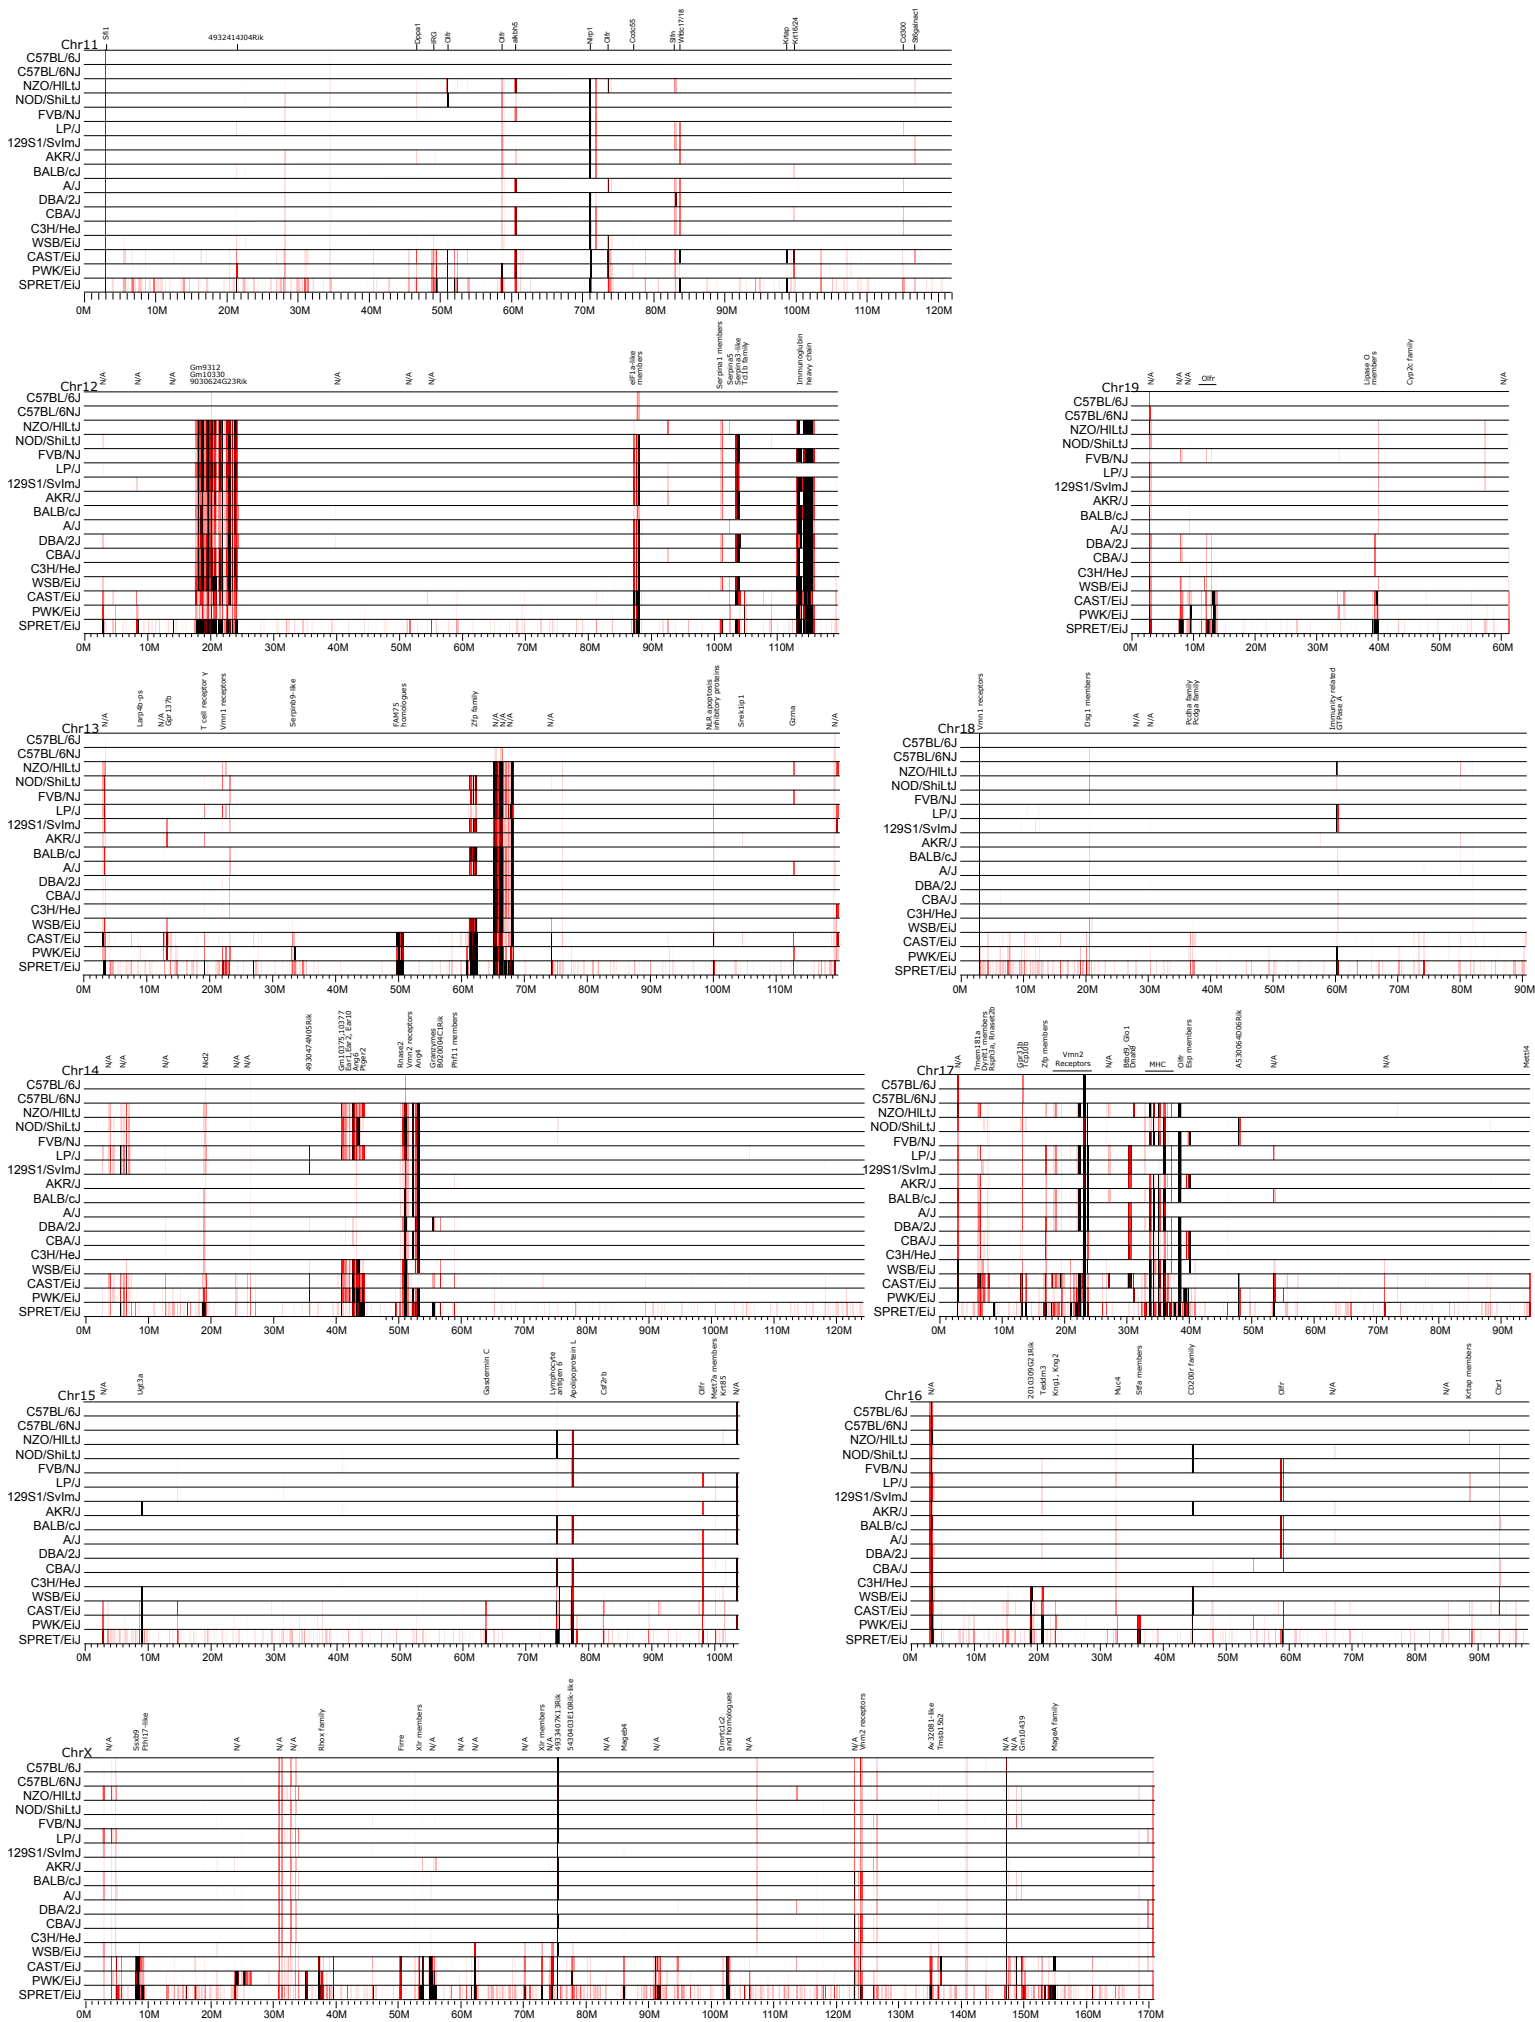

**Supplementary Figure 5:** Heterozygous SNP density across all chromosomes in 17 inbred mouse strains. Data generated using 200Kb adjacent windows, based on Illumina reads mapped to the GRCh38 reference genome. Heterozygous SNPs were obtained from the Mouse Genomes Project variation catalogue v5. (See Fig1b for more details).



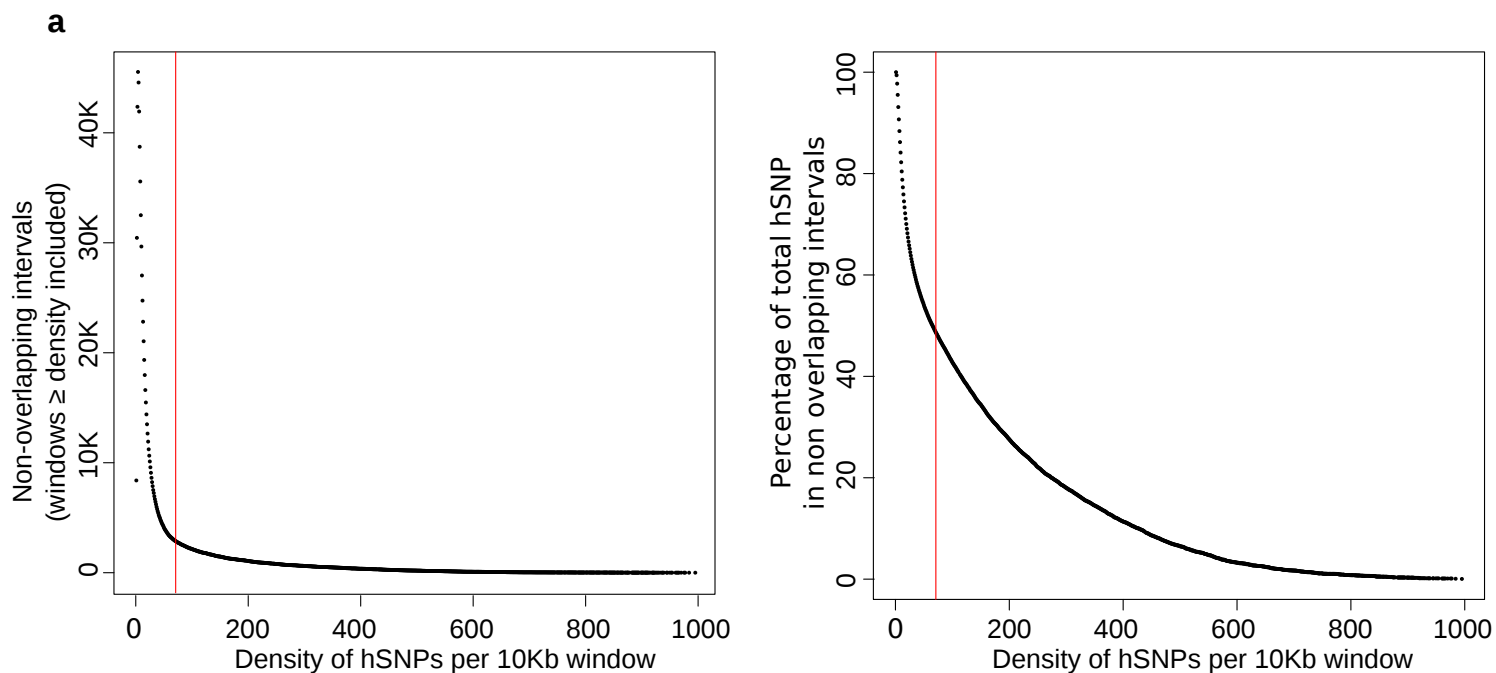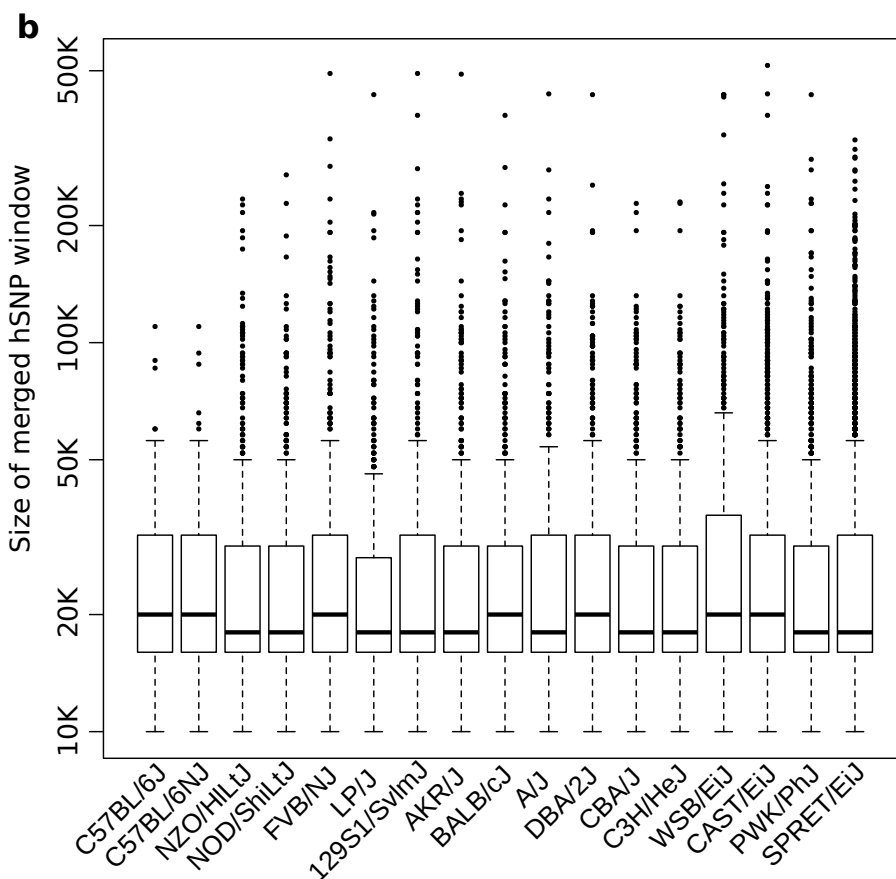

**Supplementary Figure 6 (a)** (left) The total number of unique non-overlapping hSNP regions at each cut-off ( $\geq$  hSNP per 10Kb windows). Regions are calculated by removing hSNP windows lower than the cut-off and collapsing the remainder into non-overlapping intervals. (right) The percentage of total hSNPs overlapping these regions. Red line indicates 5% most dense region cut off ( $\geq 71$ ). **(b)** Boxplot containing the size distribution (y-axis) of pass hSNP dense windows for each strain (x-axis). Sample sizes of statistics are shown in supplementary table 9 (remained regions after merging / collapsing). Box in plot indicate samples from 1st quartile to 3rd quartile, with median value marked. Black dots are outliers detected by Grubbs test.

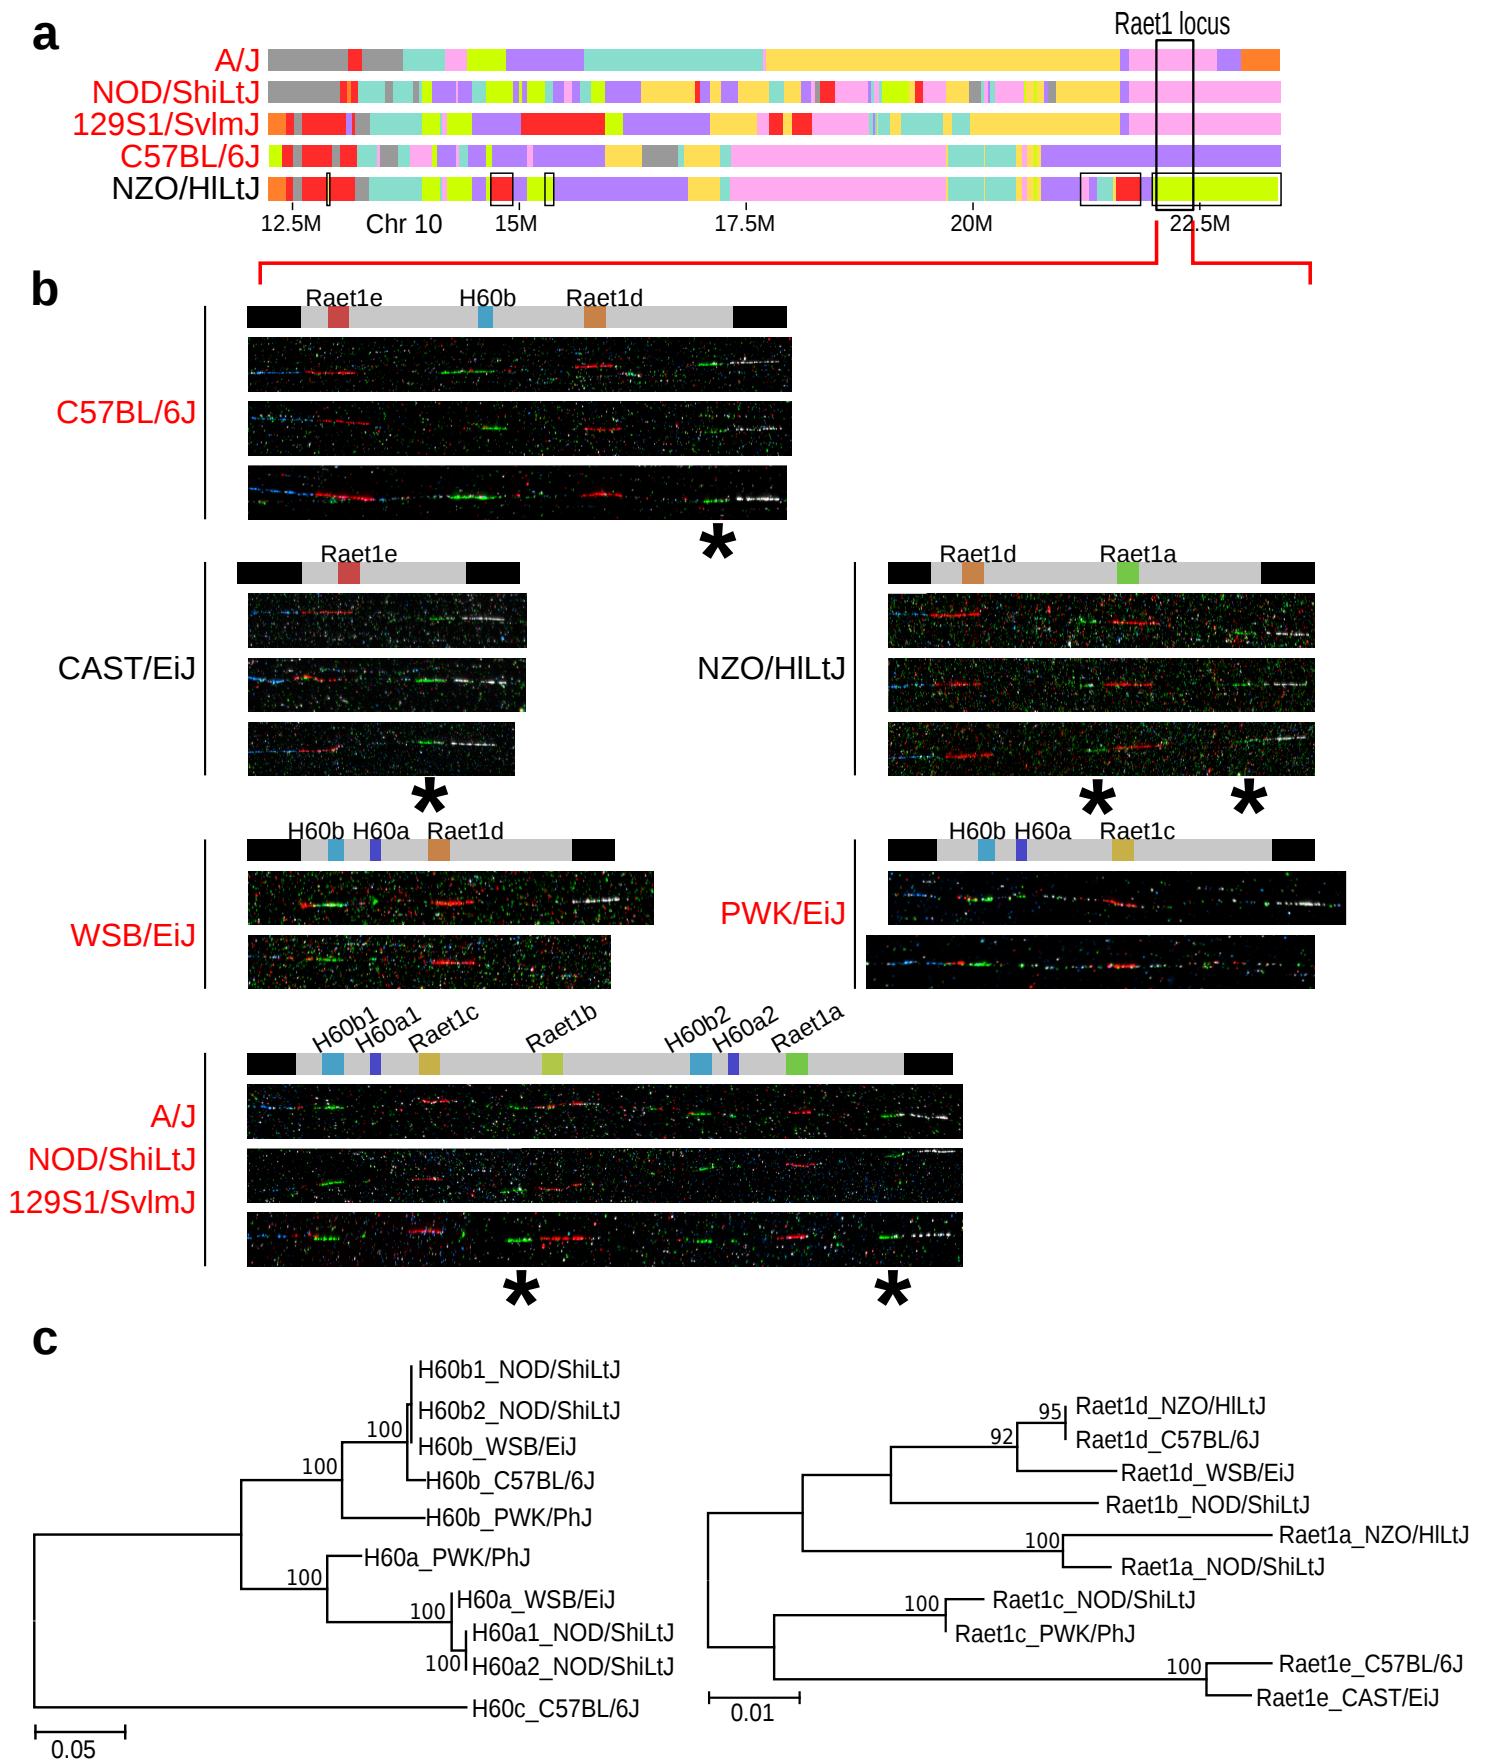

**Supplementary Figure 7: De novo assembly of *Raet1/H60* locus in mouse QTL *Aspr14*.** (a) Haplotype structure of the *Aspr14* QTL (90% CI) for the Colaborative Cross founder strains. Regions which is unique for *Aspergillus fumigatus* resistant strain are highlighted with boxes. Data are derived and modified from CISGen Mouse Phylogeny Viewer (<https://msub.csbio.unc.edu/>) Strain 129S1/SvlmJ, NOD/ShiLtJ and A/J share the same haplotype. (b) Genome structure resolved by *de novo* assembly and evidence from Fiber-FISH. Gene symbiotic colour codes are same as Figure 2b. Probe colour for Fiber-FISH photos: blue - 5'end, white - 3'end, green - *H60* alleles and adjacent region, red - *Raet1* alleles and adjacent region. Fiber-FISH hybridisation caused by a genomic duplication without *H60* coding regions are marked with an asterisk (\*). All fiber-FISH have been confirmed by at least five times identical patterns. (c) Phylogenetic tree of *H60* and *Raet1* alleles (amino acid, neighbour joining method) Note gene *H60a* is not encoded in C57BL/6 genome.

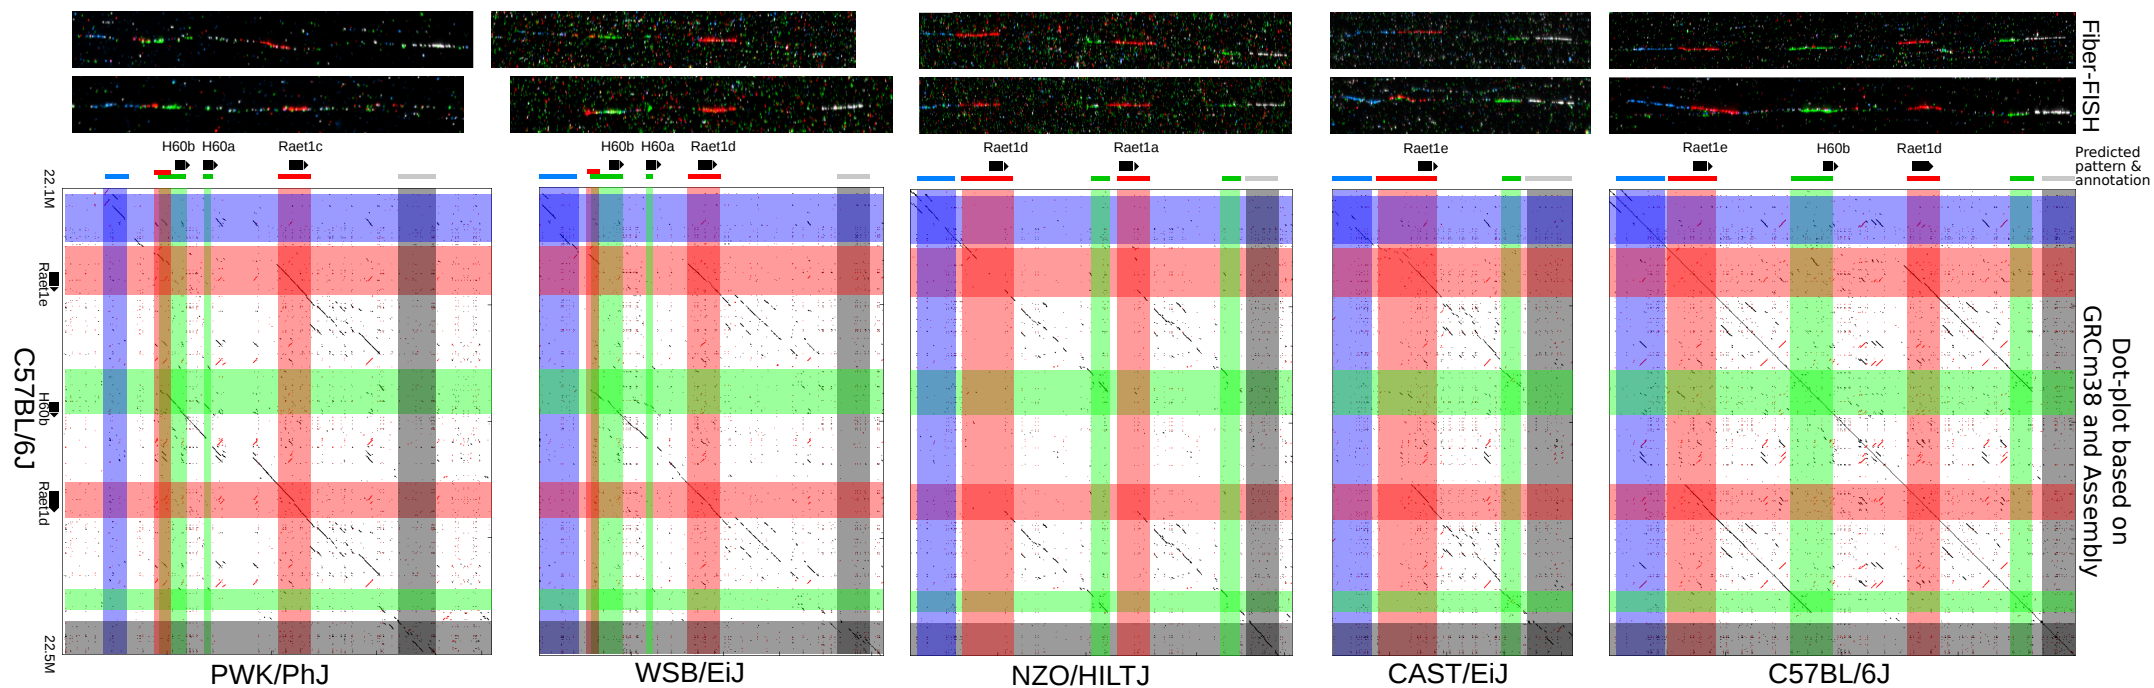

**Supplementary Figure 8: Mouse strains *de novo* assemblies accurately reflects the Fiber-FISH representation of the Raet1/H60 locus.**

Left: Fiber-FISH observation, probe colour is same as Supplementary Figure 7. Middle: Annotated Raet1/H60 CDs and predicted pattern of Fiber-FISH based on the *de novo* sequence. Right: dot plot between GRCm38 and *de novo* assembly of other parental mouse strains with the gap size adjusted. Fiber-FISH samples shown here are identical to Supplementary Figure 7.



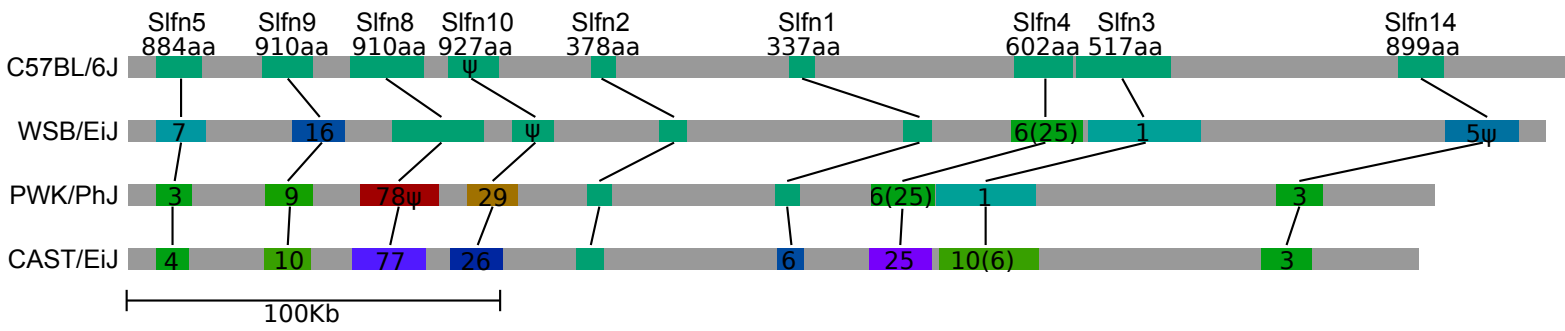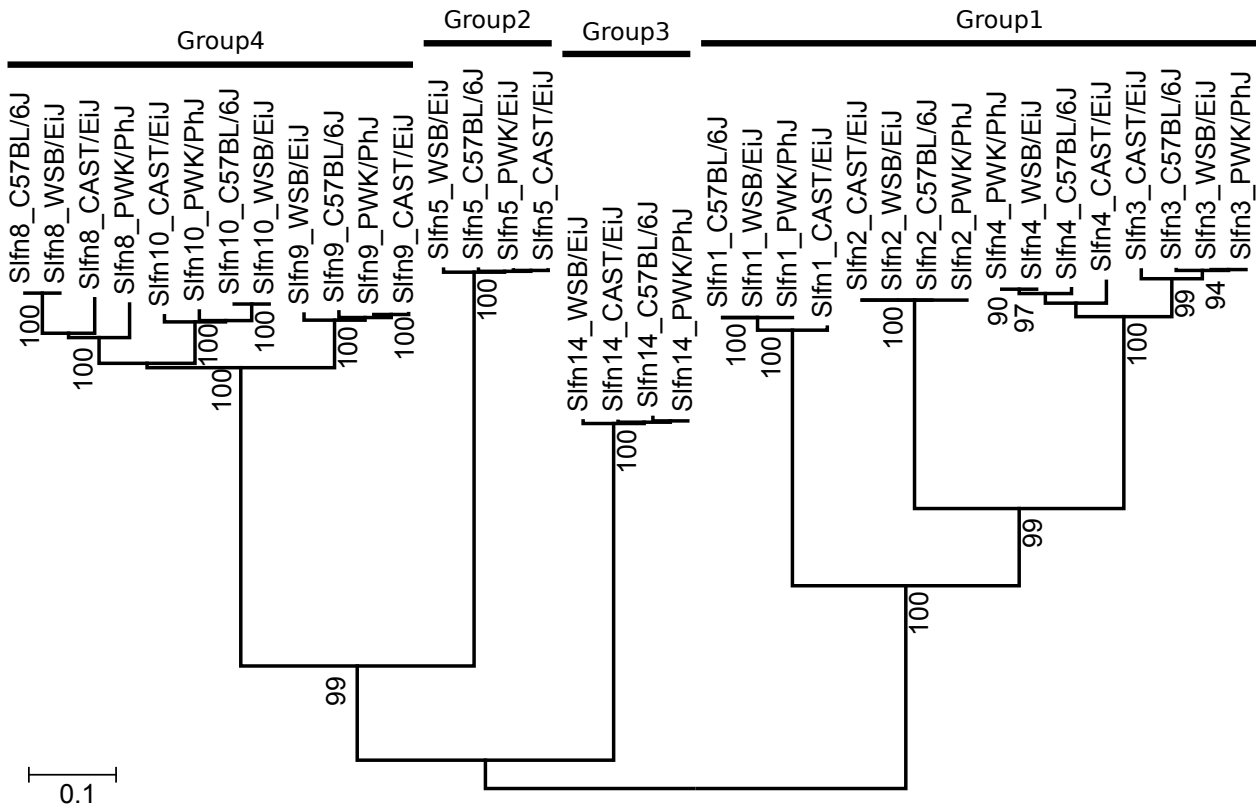

**Supplementary Figure 10: Comparison of *Slfn* alleles in C57BL/6J, WSB/EiJ, PWK/PhJ and CAST/EiJ.** (Top) Genome structure of *Slfn* locus in four mouse strains. Colour blocks indicate gene family members, numbers on each block indicate amino acid mismatch compared to C57BL/6J reference; number in bracket is amino acid extension caused by new start codons or loss of stop codons. Colour of each block indicate their phylogenetic relationship. "ψ" indicates pseudogenes. (bottom) Amino acid neighbour joining phylogenetic tree of *Slfn* family members. Bootstraps are shown if value >90.

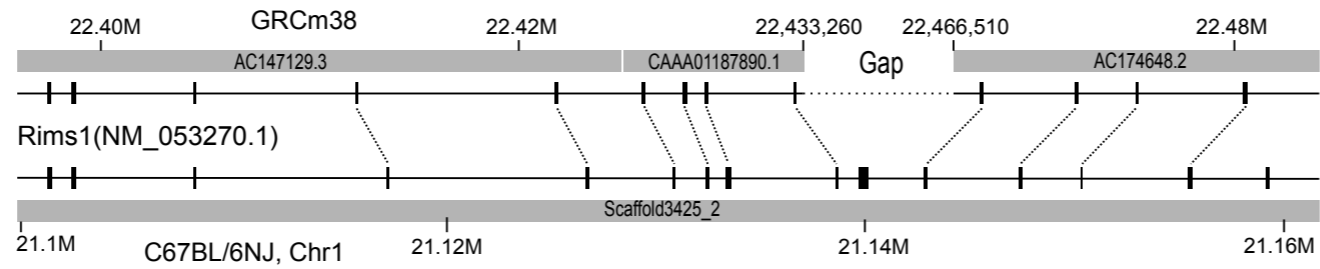

**Supplementary Figure 11 Completion of Rims1 structures by the strain assemblies.** Two additional exons that are located in a gap region of GRCm38 were identified in the C57BL/6NJ genome for Rims1.

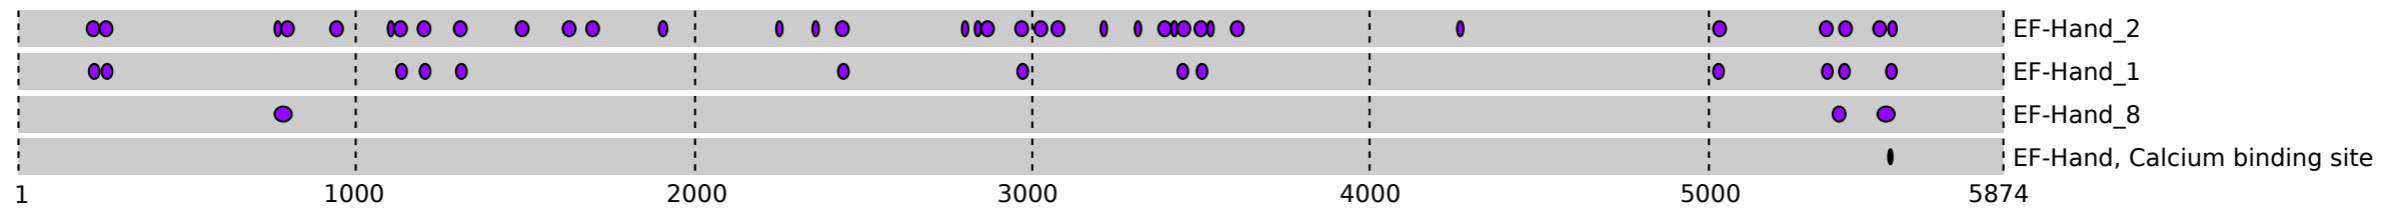

**Supplementary Figure 12 Repeats and protein domains of Efcab3-like.** Ef-Hand\_2 (PS50222), EF-Hand\_1(SM00054) EF-Hand\_8(PF13883) and EF-Hand\_1 Calcium binding site (PS00018) of the same Efcab3-like protein isoform were shown in four independent rows. Domain prediction was accomplished by InterPro (<https://www.ebi.ac.uk/interpro/>).

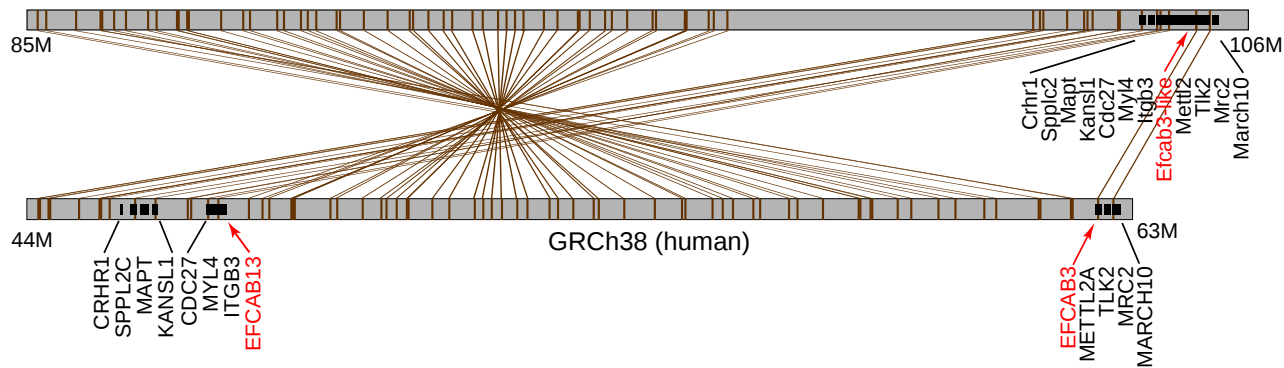

**Supplementary Figure 13, a comparison of the human genes EFCAB3 and EFCAB13 and mouse *Efcab3-like*.** Synteny analysis shows that EFCAB13 and EFCAB3 in human are the result of a chromosomal rearrangement which split mouse *Efcab3-like* in the *Homininae* common ancestor.

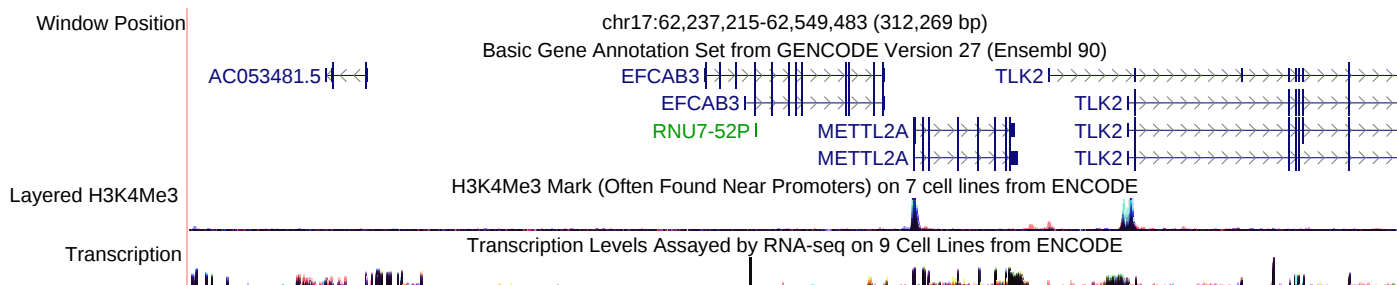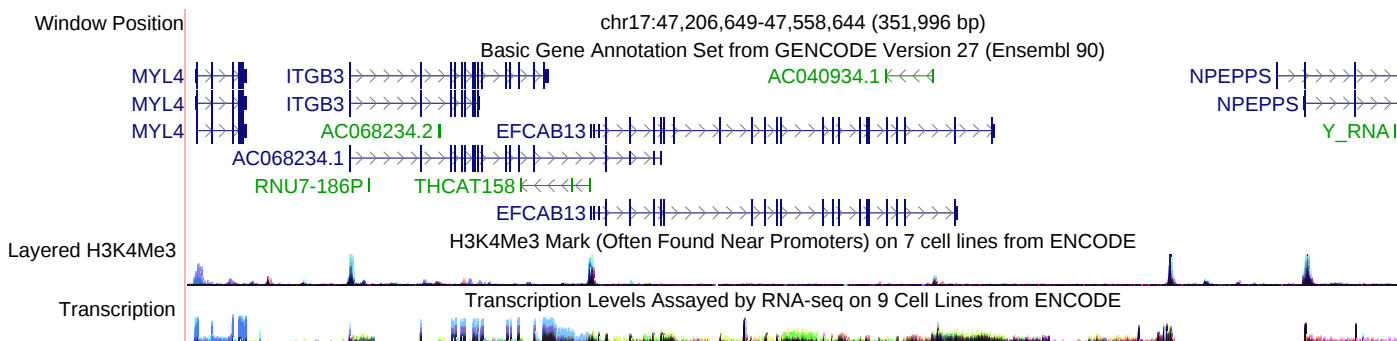

**Supplementary Figure 14 , expression of EFCAB3 and EFCAB13 in human.** In human, chimpanzee and gorilla the ancestral *Efcab3-like* is broken into two pieces due to a 15Mbp inversion on chr17. The ancestral promoter can be seen on the *EFCAB13* side in the H3K4Me3 track, and expression across many tissue types in the transcription track (bottom). In contrast, the *EFCAB3* side has no promoter signal and minimal measurable expression (top).

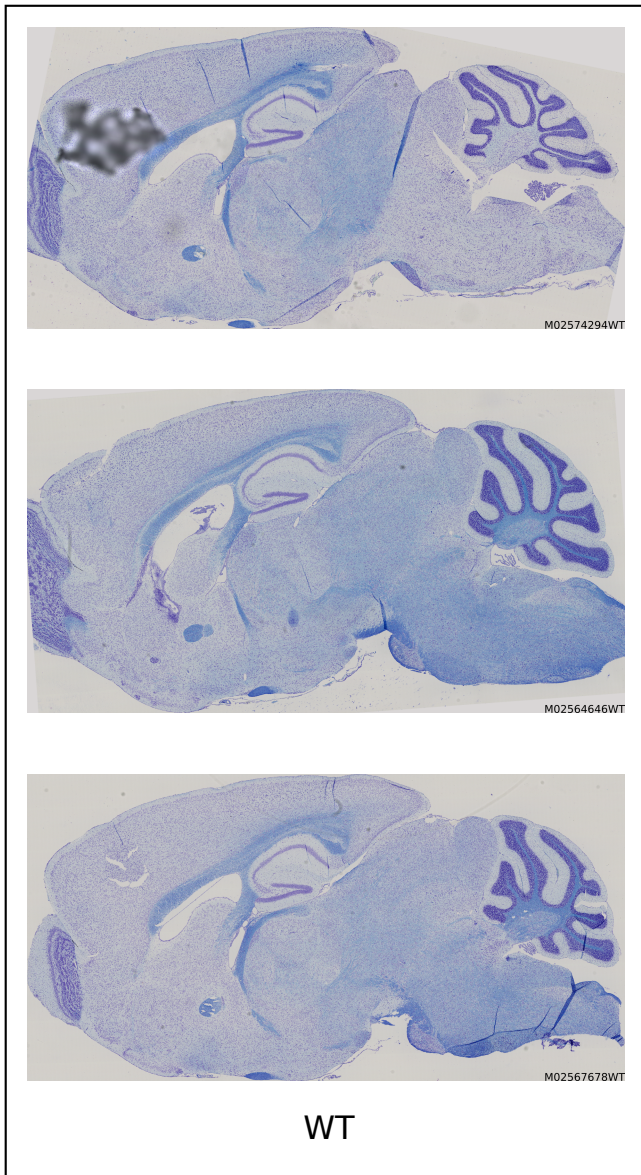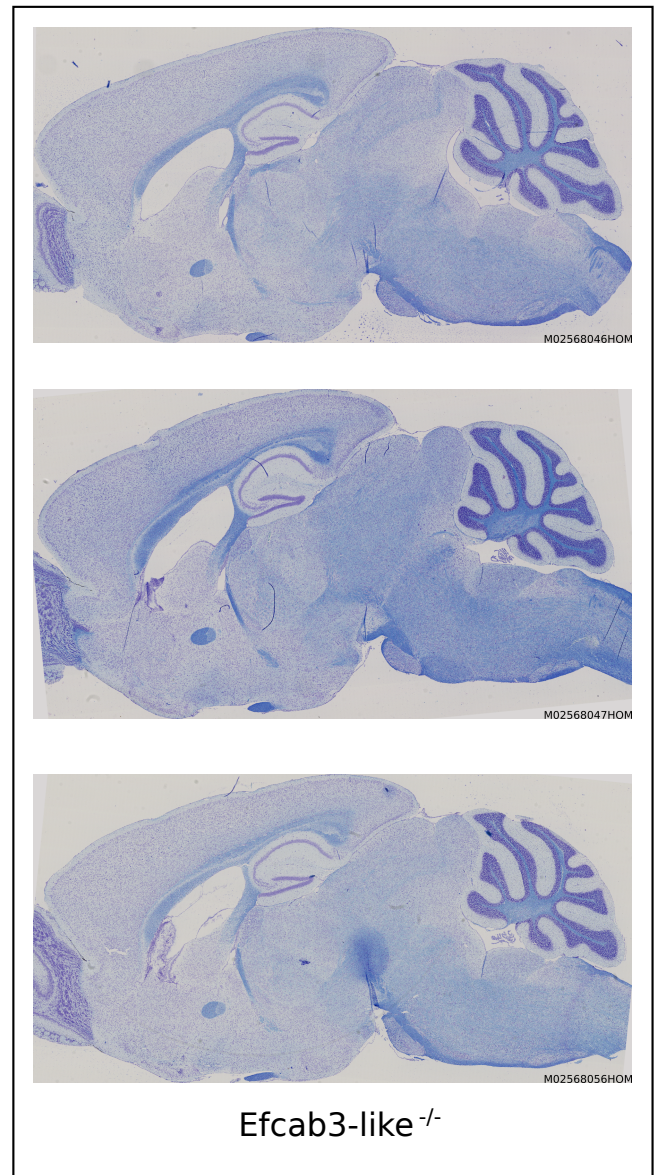

**Supplementary Figure 15.** Representative sagittal brain images, double-stained with luxol fast blue and cresyl violet acetate, of matched wild type controls (WT, n = 3, left) and *Efcab3-like*<sup>-/-</sup> (n = 3, right), showing a larger cerebellum, enlarged lateral ventricle and increased size of the pontine nuclei.



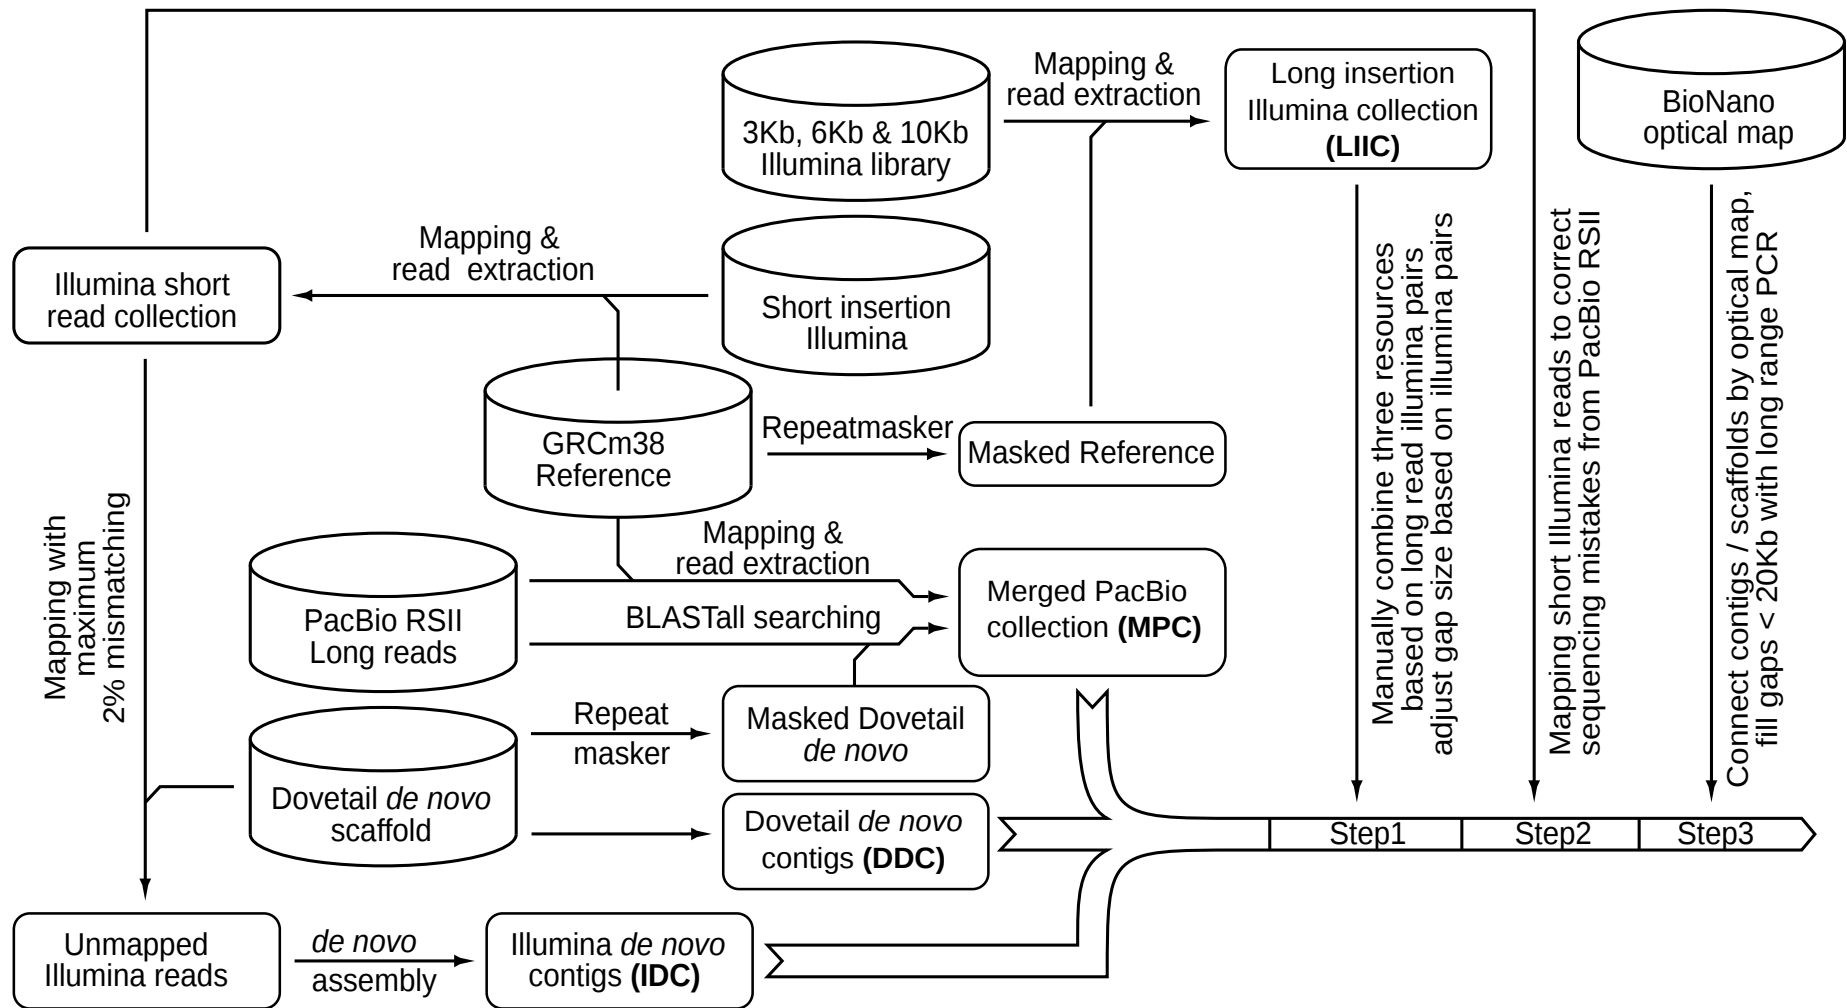

**Supplementary Figure 16: Flowchart of Targeted reassembly pipeline.** Input materials are including whole genome short insertion Illumina, 3Kbp, 6Kbp and 10Kbp long insertion Illumina, PacBio RSII reads, Dovetail *de novo* and BioNano optical map (indicated by cylinders). Raw data are further processed into: Dovetail *de novo* contigs (DDC), Merged PacBio collection (MPC), Illumina *de novo* contigs (IDC) and Long insertion Illumina collection (LIIC). Manual adjustment and joining were performed on them, and the sequence were further polished with short and long insertion Illumina reads. Finally, BioNano optical map were used to adjust the size of long (>10Kbp) gaps.

**Supplementary Table 1: Summary of the genome assemblies and strain specific gene annotation.**

| Strain      | Contigs N50 (bp) | Scaffolds N50 (bp) | Total length (Gbp) | Unknown base (%) | Unplaced length (Mbp) | Protein coding genes | Coding transcripts | Non-coding genes | Non-coding transcripts |
|-------------|------------------|--------------------|--------------------|------------------|-----------------------|----------------------|--------------------|------------------|------------------------|
| 129S1/SvImJ | 15,777           | 499,579            | 2.695              | 14.86            | 37.099                | 20,539               | 45,695             | 20,234           | 57,246                 |
| A/J         | 21,208           | 803,000            | 2.593              | 10.43            | 36.306                | 20,550               | 45,797             | 20,221           | 57,234                 |
| AKR/J       | 26,398           | 663,000            | 2.669              | 12.82            | 42.758                | 20,541               | 45,824             | 20,159           | 57,174                 |
| BALB/cJ     | 17,994           | 729,225            | 2.597              | 10.93            | 29.869                | 20,592               | 45,885             | 20,158           | 57,050                 |
| C3H/HeJ     | 15,887           | 780,348            | 2.672              | 13.86            | 2.047                 | 20,466               | 45,624             | 19,899           | 56,778                 |
| C57BL/6NJ   | 13,800           | 1,402,000          | 2.781              | 17.26            | 24.813                | 20,639               | 45,937             | 20,797           | 57,707                 |
| CAST/EiJ    | 12,682           | 24,445,013         | 2.635              | 13.7             | 18.916                | 20,077               | 44,635             | 19,306           | 58,024                 |
| CBA/J       | 14,386           | 1,024,365          | 2.884              | 20.29            | 36.929                | 20,454               | 45,574             | 19,884           | 56,735                 |
| DBA/2J      | 14,576           | 715,000            | 2.578              | 11.22            | 27.352                | 20,530               | 45,731             | 20,026           | 56,869                 |
| FVB/NJ      | 18,499           | 231,286            | 2.557              | 10.56            | 31.154                | 20,479               | 45,548             | 20,027           | 56,883                 |
| LP/J        | 13,897           | 1,575,000          | 2.704              | 15.65            | 26.442                | 20,499               | 45,642             | 20,103           | 56,924                 |
| NOD/ShiLtJ  | 10,216           | 833,100            | 2.943              | 22.71            | 38.312                | 20,453               | 45,450             | 20,043           | 56,880                 |
| NZO/HILtJ   | 13,897           | 455,398            | 2.704              | 15.65            | 34.871                | 20,704               | 46,111             | 20,816           | 57,968                 |
| PWK/PhJ     | 5,178            | 24,747,862         | 2.533              | 8.92             | 26.179                | 19,998               | 44,419             | 19,034           | 57,619                 |
| SPRET/EiJ   | 19,477           | 19,680,963         | 2.593              | 10.64            | 32.561                | 20,028               | 44,495             | 18,720           | 56,897                 |
| WSB/EiJ     | 12,897           | 783,034            | 2.671              | 15.64            | 17.809                | 20,185               | 44,885             | 19,459           | 56,302                 |

**Supplementary Table 2: Unplaced scaffolds**

| Strain      | Number of scaffolds | Total length (bp) | Total size of unplaced scaffolds (bp) | Percentage of unplaced (%) | N50 scaffold size (bp) | Largest scaffold (bp) | Shortest scaffold (bp) | scaffold %N | Repeat sequences (%) |
|-------------|---------------------|-------------------|---------------------------------------|----------------------------|------------------------|-----------------------|------------------------|-------------|----------------------|
| 129S1/SvlmJ | 7133                | 2695574028        | 37099665                              | 1.376                      | 5944                   | 352450                | 2000                   | 28.65       | 71.59                |
| A/J         | 4667                | 2593688561        | 36306833                              | 1.400                      | 14610                  | 406133                | 320                    | 30.16       | 66.64                |
| AKR/J       | 5932                | 2669948688        | 42758867                              | 1.601                      | 11220                  | 466374                | 442                    | 37.91       | 64.25                |
| BALB/cJ     | 3804                | 2597474342        | 29869912                              | 1.150                      | 14158                  | 359440                | 1636                   | 28.77       | 69.23                |
| C3H/HeJ     | 4048                | 2672083609        | 29047707                              | 1.087                      | 11700                  | 386019                | 464                    | 40.26       | 70.53                |
| C57BL/6NJ   | 3873                | 2781986799        | 24813488                              | 0.892                      | 8727                   | 360195                | 309                    | 48.15       | 73.15                |
| CAST/EiJ    | 2956                | 2635074085        | 18916565                              | 0.718                      | 9514                   | 544993                | 2000                   | 32.88       | 77.87                |
| CBA/J       | 5445                | 2884798194        | 36929761                              | 1.280                      | 9637                   | 431894                | 319                    | 46.87       | 67.46                |
| DBA/2J      | 4084                | 2578809409        | 27352749                              | 1.061                      | 9941                   | 359851                | 435                    | 27.46       | 74                   |
| FVB/NJ      | 4992                | 2557464886        | 31154404                              | 1.218                      | 9414                   | 349820                | 2000                   | 18.83       | 72.62                |
| LP/J        | 3478                | 2704355636        | 26442867                              | 0.978                      | 14461                  | 430939                | 425                    | 42.28       | 73.88                |
| NOD/ShiLtJ  | 5523                | 2943750595        | 38312655                              | 1.301                      | 10715                  | 393788                | 186                    | 40.79       | 61.36                |
| NZO/HILtJ   | 7001                | 2664395485        | 34871811                              | 1.309                      | 5526                   | 355679                | 2000                   | 30.8        | 71                   |
| PWK/PhJ     | 3119                | 2533808356        | 26179036                              | 1.033                      | 11969                  | 524517                | 2000                   | 40.48       | 72.31                |
| SPRET/EiJ   | 5383                | 2593026018        | 32561454                              | 1.256                      | 7465                   | 662343                | 1891                   | 35.59       | 69.92                |
| WSB/EiJ     | 2218                | 2671848035        | 17809522                              | 0.667                      | 18611                  | 395137                | 1049                   | 23.81       | 78.88                |

**Supplementary Table 3: Genes on unplaced scaffolds**

|             | Total | IG_C_gene | IG_J_gene | IG_D_gene | IG_D_pseudogene | IG_V_gene | IG_V_pseudogene | TEC | TR_J_gene | TR_V_gene | TR_V_pseudogene | antisense | lincRNA | miRNA | misc_RNA | processed_pseudo | processed_transcript | protein_coding | rRNA | snRNA | snoRNA | Transcribed/processed | unprocessed | ribozyme | pseudogene | Mt_rRNA | Mt_tRNA | likely_coding | miRNA |
|-------------|-------|-----------|-----------|-----------|-----------------|-----------|-----------------|-----|-----------|-----------|-----------------|-----------|---------|-------|----------|------------------|----------------------|----------------|------|-------|--------|-----------------------|-------------|----------|------------|---------|---------|---------------|-------|
| 129S1/SvImJ | 335   | 0         | 0         | 3         | 1               | 13        | 13              | 5   | 1         | 11        | 2               | 2         | 8       | 7     | 1        | 83               | 2                    | 96             | 1    | 5     | 10     | 3                     | 68          | 0        | 0          | 0       | 0       | 0             | 0     |
| A/J         | 318   | 0         | 0         | 14        | 10              | 0         | 0               | 2   | 0         | 15        | 5               | 5         | 8       | 9     | 0        | 63               | 5                    | 114            | 1    | 2     | 6      | 2                     | 56          | 1        | 0          | 0       | 0       | 0             | 0     |
| AKR/J       | 331   | 0         | 0         | 15        | 8               | 0         | 0               | 1   | 0         | 5         | 1               | 2         | 8       | 4     | 1        | 88               | 5                    | 130            | 2    | 0     | 6      | 1                     | 53          | 0        | 1          | 0       | 0       | 0             | 0     |
| BALB/cJ     | 338   | 0         | 0         | 0         | 0               | 24        | 15              | 1   | 0         | 14        | 5               | 1         | 6       | 9     | 1        | 78               | 2                    | 109            | 0    | 1     | 8      | 4                     | 60          | 0        | 0          | 0       | 0       | 0             | 0     |
| C3H/HeJ     | 245   | 0         | 0         | 1         | 0               | 11        | 3               | 1   | 0         | 12        | 1               | 2         | 5       | 6     | 0        | 55               | 0                    | 112            | 0    | 1     | 6      | 1                     | 28          | 0        | 0          | 0       | 0       | 0             | 0     |
| C57BL/6NJ   | 240   | 0         | 0         | 0         | 0               | 16        | 7               | 2   | 0         | 16        | 4               | 2         | 9       | 3     | 0        | 40               | 1                    | 91             | 1    | 5     | 8      | 2                     | 29          | 0        | 1          | 1       | 2       | 0             | 0     |
| CAST/EiJ    | 133   | 2         | 1         | 0         | 0               | 6         | 3               | 1   | 0         | 0         | 0               | 0         | 3       | 6     | 0        | 42               | 0                    | 40             | 0    | 2     | 3      | 1                     | 22          | 0        | 0          | 0       | 0       | 1             | 0     |
| CBA/J       | 240   | 0         | 0         | 1         | 1               | 10        | 5               | 1   | 0         | 8         | 0               | 1         | 2       | 8     | 1        | 60               | 0                    | 103            | 1    | 3     | 6      | 0                     | 29          | 0        | 0          | 0       | 0       | 0             | 0     |
| DBA/2J      | 266   | 0         | 0         | 0         | 0               | 17        | 7               | 3   | 0         | 9         | 1               | 2         | 6       | 10    | 0        | 55               | 2                    | 106            | 1    | 2     | 7      | 4                     | 34          | 0        | 0          | 0       | 0       | 0             | 0     |
| FVB/NJ      | 375   | 0         | 0         | 2         | 0               | 12        | 14              | 4   | 0         | 14        | 0               | 5         | 9       | 9     | 1        | 97               | 2                    | 130            | 1    | 5     | 5      | 5                     | 59          | 1        | 0          | 0       | 0       | 0             | 0     |
| LP/J        | 204   | 0         | 0         | 0         | 0               | 6         | 6               | 2   | 2         | 5         | 2               | 1         | 10      | 6     | 1        | 42               | 3                    | 70             | 0    | 0     | 7      | 2                     | 39          | 0        | 0          | 0       | 0       | 0             | 0     |
| NOD/ShiLtJ  | 297   | 0         | 0         | 0         | 0               | 10        | 12              | 0   | 0         | 14        | 2               | 6         | 4       | 8     | 0        | 74               | 1                    | 98             | 1    | 7     | 8      | 2                     | 50          | 0        | 0          | 0       | 0       | 0             | 0     |
| NZO/HILtJ   | 410   | 0         | 0         | 1         | 0               | 28        | 19              | 3   | 0         | 11        | 0               | 4         | 8       | 8     | 1        | 91               | 2                    | 164            | 0    | 7     | 11     | 3                     | 48          | 0        | 0          | 0       | 1       | 0             | 0     |
| PWK/PhJ     | 147   | 0         | 0         | 0         | 0               | 5         | 6               | 1   | 0         | 14        | 1               | 0         | 3       | 2     | 0        | 31               | 0                    | 46             | 0    | 3     | 2      | 1                     | 32          | 0        | 0          | 0       | 0       | 0             | 0     |
| SPRET/EiJ   | 89    | 0         | 0         | 0         | 0               | 3         | 2               | 0   | 0         | 0         | 0               | 0         | 0       | 0     | 0        | 15               | 3                    | 39             | 1    | 3     | 0      | 0                     | 19          | 0        | 0          | 0       | 0       | 0             | 4     |
| WSB/EiJ     | 180   | 0         | 0         | 0         | 0               | 15        | 4               | 1   | 0         | 10        | 0               | 2         | 8       | 5     | 3        | 33               | 1                    | 61             | 2    | 4     | 7      | 0                     | 24          | 0        | 0          | 0       | 0       | 0             | 0     |

**Supplementary Table 4: Mitochondrial DNA (mtDNA) Sequence Variation of Commonly Used Laboratory Mouse Strains.**

| Strain \ # of bp                        |           | C57BL/6NJ  | FVB/NJ             | BALB/cJ            | DBA/2J   | LP/J     | AKR/J    | NOD/ShiLtJ         | A/J      | CBA/J    | C3H/HeJ  | 129S1/SvImJ | C57BL/6J†                    | # of Variant Strains | SNP     | Predicted AA Change |
|-----------------------------------------|-----------|------------|--------------------|--------------------|----------|----------|----------|--------------------|----------|----------|----------|-------------|------------------------------|----------------------|---------|---------------------|
| Light Strand Origin                     | 5,182.1   | :°         |                    |                    |          |          | A*       |                    |          |          |          |             |                              | 1                    | -       |                     |
| Cox1                                    | 5,335     | T          |                    |                    |          | C*       |          |                    |          |          |          |             |                              | 1                    | T5335C  | I ->T               |
| Atp8                                    | 7,778     | G          | T                  |                    |          |          |          |                    |          |          |          |             |                              | 1                    | G7778T  | D ->Y               |
| Cox3                                    | 8,889     | G          |                    |                    |          |          |          |                    |          |          | A*       |             |                              | 1                    | G8889A  | A ->T               |
| Cox3                                    | 9,348     | G          |                    | A                  |          |          |          | A                  | A        | A        | A        |             |                              | 5                    | G9348A  | V ->I               |
| tRNA-Gly                                | 9,461     | C          |                    |                    |          |          |          |                    |          |          |          |             | T                            | 1                    | C9461T  | -                   |
| tRNA-Arg                                | 9,820.1   | :          |                    |                    |          |          |          |                    |          |          | T        |             |                              | 1                    | -       | -                   |
| tRNA-Arg                                | 9820-9829 | 9A         | 9A                 | 9A                 | 9A       | 10A      | 9A       | 10A                | 9A       | 9A       | 9A       | 9A          | 8A                           | 3                    | -       | -                   |
| Nd5                                     | 11,902    | T          |                    | C*                 |          |          |          |                    |          |          |          |             |                              | 1                    | T11902C | I ->T               |
| Cytb                                    | 15,124    | A          |                    |                    |          |          |          |                    |          |          |          | G           |                              | 1                    | A15124G | I ->V               |
| Differences vs. Reference               |           | Reference  | 1                  | 2                  | 0        | 2        | 1        | 2                  | 1        | 1        | 3        | 1           | 2                            |                      |         |                     |
| Previous Genbank Entries                | KR020497  | KR020497.1 | EF108338, GQ871746 | EF108333 BALB/cByJ | EF108337 | FJ374648 | EF108332 | AY533107, EF108340 | EF108331 | AY466499 | EF108335 | EF108330    | DQ106412, AY172335, EF108336 |                      |         |                     |
| SNP Discordant with the GenBank Entries | -         | -          | -                  | T11902C            | -        | T5335C   | :5182.1A | -                  | -        | -        | G8889A   | -           |                              |                      |         |                     |

® - C57BL/6NJ was used as the reference for comparisons as this strain carries a common mtDNA haplotype.

† - C57BL/6J was not sequenced by this effort. This strain was included in comparisons due to use as a universal control strain.

\* - Marks a SNP that is discordant with the mtDNA sequence that was previously published

° - A colon (:) is used to mark a missing base in the reference strain where an insertion was identified.

**Supplementary Table 5: Sequence Accuracy by Samtools and Bcftools**

| Strain      | Length        | Unknown bases | SNPs    | Indels  | Errors per Kbp |
|-------------|---------------|---------------|---------|---------|----------------|
| 129S1/SvImJ | 2,732,659,664 | 411,136,651   | 159,923 | 54,379  | 0.092          |
| A/J         | 2,630,043,295 | 281,603,272   | 185,491 | 67,732  | 0.108          |
| AKR/J       | 2,712,819,408 | 358,705,903   | 183,665 | 80,142  | 0.112          |
| BALB/cJ     | 2,627,356,258 | 292,612,086   | 177,423 | 53,543  | 0.099          |
| C3H/HeJ     | 2,701,165,093 | 382,164,387   | 173,342 | 54,572  | 0.098          |
| C57BL/6NJ   | 2,806,994,964 | 492,229,250   | 187,268 | 54,396  | 0.104          |
| CAST/EiJ    | 2,653,974,351 | 367,107,716   | 192,942 | 58,626  | 0.110          |
| CBA/J       | 2,921,935,818 | 602,869,723   | 166,622 | 56,942  | 0.096          |
| DBA/2J      | 2,606,172,597 | 296,870,923   | 174,013 | 57,200  | 0.100          |
| FVB/NJ      | 2,588,608,472 | 275,937,215   | 202,407 | 53,561  | 0.111          |
| LP/J        | 2,730,912,269 | 434,657,747   | 182,429 | 58,264  | 0.105          |
| NOD/ShiLtJ  | 2,982,208,028 | 684,342,392   | 177,357 | 48,214  | 0.098          |
| NZO/HILtJ   | 2,699,262,892 | 366,442,716   | 163,570 | 54,078  | 0.093          |
| PWK/PhJ     | 2,595,235,564 | 285,549,885   | 165,708 | 52,979  | 0.095          |
| SPRET/EiJ   | 2,625,578,457 | 287,409,215   | 215,688 | 60,948  | 0.118          |
| WSB/EiJ     | 2,689,661,975 | 422,209,054   | 151,984 | 57,202  | 0.092          |
| MGSCv3      | 2,580,596,378 | 206,479,311   | 520,410 | 272,894 | 0.334          |
| GRCm38      | 2,730,871,774 | 78,088,340    | 38,538  | 14,829  | 0.020          |

**Supplementary Table 6: Quality control by PCR primers**

| <b>Strain</b>   | <b>Inward</b> | <b>Error</b> |
|-----------------|---------------|--------------|
| A/J             | 569           | 0.048        |
| AKR/J           | 570           | 0.047        |
| BALB/cJ         | 567           | 0.052        |
| C3H/HeJ         | 558           | 0.067        |
| C57BL/6J-GRCm38 | 598           | -            |
| C57BL/6J-MGSCv3 | 538           | 0.100        |
| C57BL/6NJ       | 593           | 0.008        |
| CBA/J           | 569           | 0.048        |
| DBA/2J          | 563           | 0.059        |
| LP/J            | 570           | 0.047        |

**Supplementary Table 7: cDNA PacBio concordant alignment rates (%)**

|               | <b>GRCm38</b> | <b>MGSCv3</b> | <b>CAST/EiJ</b> | <b>PWK/PhJ</b> | <b>SPRET/EiJ</b> |
|---------------|---------------|---------------|-----------------|----------------|------------------|
| <b>Liver</b>  | 63.07         | 51.70         | 54.37           | 51.69          | 53.01            |
| <b>Spleen</b> | 69.76         | 67.99         | 58.57           | 56.12          | 62.32            |

**Supplementary Table 8: RNAseq Accession numbers**

| Strain      | RNA-Seq                                        |                                                  |                        |           |                                      | Pacbio    |           |
|-------------|------------------------------------------------|--------------------------------------------------|------------------------|-----------|--------------------------------------|-----------|-----------|
|             | Brain                                          | B-cell and T-cell                                | Lung                   | Spleen    | Liver                                | Liver     | Spleen    |
| 129S1/SvImJ | ERS028660                                      |                                                  | SRS502568 to SRS502584 |           | SRS411953 to SRS411968               |           |           |
| A/J         | ERS028666                                      |                                                  | SRS502583 to SRS502598 |           | SRS411969 to SRS411984               |           |           |
| AKR/J       | ERS028672                                      |                                                  |                        |           |                                      |           |           |
| BALB/cJ     | ERS028670                                      |                                                  |                        |           |                                      |           |           |
| C3H/HeJ     | ERS028658                                      |                                                  |                        |           |                                      |           |           |
| C57BL/6J    |                                                |                                                  |                        | ERS819832 | ERS819829                            | ERS716499 | ERS716503 |
| C57BL/6NJ   | ERS028664                                      |                                                  |                        |           |                                      |           |           |
| CAST/EiJ    | ERS028668, SRS875111<br>SRS877557 to SRS877562 | ERS354502 to ERS354507<br>ERS354524 to ERS354528 | SRS502615 to SRS502629 | ERS819831 | ERS819828,<br>SRS412001 to SRS412016 | ERS716498 | ERS716502 |
| CBA/J       | ERS028662                                      |                                                  |                        |           |                                      |           |           |
| DBA/2J      | ERS028659                                      |                                                  |                        |           |                                      |           |           |
| FVB/NJ      | ERS819833                                      |                                                  |                        |           |                                      |           |           |
| LP/J        | ERS028671                                      |                                                  |                        |           |                                      |           |           |
| NOD/ShiLtJ  | ERS028663                                      |                                                  | SRS502630 to SRS502646 |           | SRS412017 to SRS412032               |           |           |
| NZO/HILtJ   | ERS028667                                      |                                                  | SRS502645 to SRS502659 |           | SRS412033 to SRS412048               |           |           |
| PWK/PhJ     | ERS028661<br>SRS877549 to SRS877556            |                                                  | SRS502660 to SRS502674 | ERS819830 | ERS819827<br>SRS412049 to SRS412064  | ERS716497 | ERS716501 |
| SPRET/EiJ   | ERS028665                                      |                                                  |                        |           | ERS819826                            | ERS716496 | ERS716500 |
| WSB/EiJ     | ERS028669<br>SRS877541 to SRS877548            |                                                  | SRS502675 to SRS502690 |           | SRS412065 to SRS412080               |           |           |



**Supplementary Table 9: hSNP density analysis**

|             | pass het<br>SNPs | Raw 10kb<br>windows<br>with 1+<br>hSNPs | Raw 10kb<br>windows<br>with 7+<br>hSNPs | Remained<br>regions after<br>merging /<br>collapsing | hSNPs in<br>remained<br>regions | % hSNPs in<br>remained<br>regions | Total bps<br>overlap | Total CDS<br>bps | Overlapping<br>genes | PantherDB<br>defense /<br>immunity<br>genes |
|-------------|------------------|-----------------------------------------|-----------------------------------------|------------------------------------------------------|---------------------------------|-----------------------------------|----------------------|------------------|----------------------|---------------------------------------------|
| 129S1/SvImJ | 463053           | 334792                                  | 5979                                    | 530                                                  | 239013                          | 51.6168                           | 16924530             | 280810           | 394                  | 33                                          |
| AKR/J       | 442255           | 347646                                  | 5597                                    | 522                                                  | 219368                          | 49.6022                           | 16074522             | 257824           | 357                  | 48                                          |
| A/J         | 434506           | 324241                                  | 5737                                    | 539                                                  | 224887                          | 51.7569                           | 16400539             | 261716           | 359                  | 34                                          |
| BALB/cJ     | 404719           | 319544                                  | 5340                                    | 506                                                  | 204053                          | 50.4184                           | 15318506             | 258752           | 363                  | 33                                          |
| C3H/HeJ     | 390160           | 328447                                  | 4865                                    | 515                                                  | 176603                          | 45.2643                           | 14456515             | 225617           | 323                  | 33                                          |
| C57BL/6J    | 69120            | 57727                                   | 1019                                    | 117                                                  | 33747                           | 48.8238                           | 3090117              | 62769            | 55                   | 1                                           |
| C57BL/6NJ   | 116439           | 201313                                  | 1257                                    | 141                                                  | 42321                           | 36.3461                           | 3756141              | 61538            | 57                   | 1                                           |
| CAST/EiJ    | 1128279          | 591370                                  | 14104                                   | 1367                                                 | 552692                          | 48.9854                           | 40883367             | 667821           | 859                  | 72                                          |
| CBA/J       | 396321           | 310931                                  | 5136                                    | 543                                                  | 185895                          | 46.9052                           | 15322543             | 247654           | 346                  | 34                                          |
| DBA/2J      | 441953           | 312174                                  | 6102                                    | 565                                                  | 238286                          | 53.9166                           | 17450565             | 314166           | 411                  | 35                                          |
| FVB/NJ      | 446478           | 288587                                  | 6072                                    | 545                                                  | 243127                          | 54.4544                           | 17228545             | 296115           | 390                  | 40                                          |
| LP/J        | 429677           | 318637                                  | 5428                                    | 599                                                  | 201269                          | 46.8419                           | 16298599             | 262552           | 300                  | 34                                          |
| NOD/ShiLtJ  | 431691           | 347921                                  | 5574                                    | 615                                                  | 199330                          | 46.1742                           | 16766615             | 294379           | 375                  | 57                                          |
| NZO/HILtJ   | 414118           | 334121                                  | 5362                                    | 541                                                  | 194422                          | 46.9485                           | 15748541             | 234818           | 341                  | 36                                          |
| PWK/PhJ     | 1013842          | 581244                                  | 11760                                   | 1264                                                 | 439262                          | 43.3265                           | 35013264             | 567205           | 771                  | 88                                          |
| SPRET/EiJ   | 1895741          | 764285                                  | 25865                                   | 2567                                                 | 926491                          | 48.8722                           | 75592567             | 1236315          | 1442                 | 121                                         |
| WSB/EiJ     | 606014           | 368358                                  | 8279                                    | 688                                                  | 335025                          | 55.2834                           | 23038688             | 360714           | 503                  | 67                                          |
| Merged      | 4739122          | 6131338                                 | 123476                                  | 2862                                                 | 2305651                         | 48.6514                           | 97120862             | 1575166          | 1828                 | 155                                         |

**Supplementary Table 10: Panther DB representation of Genes encoded in hSNP dense regions**

|                                                     | hSNP dense regions |           |                    | GENCODE M8 CDS |           |                    | PantherDB default genes |           |                    |
|-----------------------------------------------------|--------------------|-----------|--------------------|----------------|-----------|--------------------|-------------------------|-----------|--------------------|
|                                                     | Gene count         | Gene hits | Protein class hits | Gene count     | Gene hits | Protein class hits | Gene count              | Gene hits | Protein class hits |
| Defense/immunity (PC00090)                          | 155                | 9.9%      | 14.0%              | 401            | 2.1%      | 2.7%               | 561                     | 2.6%      | 3.4%               |
| Nucleic acid binding (PC00171)                      | 131                | 8.4%      | 11.8%              | 2135           | 11.3%     | 14.5%              | 2367                    | 11.2%     | 14.6%              |
| Transcription factor (PC00218)                      | 116                | 7.4%      | 10.5%              | 1286           | 6.8%      | 8.8%               | 1457                    | 7.0%      | 9.0%               |
| Transporter (PC00227)                               | 103                | 6.6%      | 9.3%               | 942            | 5.0%      | 6.4%               | 920                     | 4.4%      | 5.8%               |
| Receptor (PC00197)                                  | 99                 | 6.3%      | 8.9%               | 1137           | 6.0%      | 7.7%               | 1086                    | 5.2%      | 6.8%               |
| Hydrolase (PC00121)                                 | 89                 | 5.7%      | 8.0%               | 1357           | 7.2%      | 9.2%               | 1483                    | 7.0%      | 9.2%               |
| Signaling molecule (PC00207)                        | 76                 | 4.9%      | 6.9%               | 959            | 5.1%      | 6.5%               | 1083                    | 5.2%      | 6.8%               |
| Enzyme modulator (PC00095)                          | 73                 | 4.7%      | 6.6%               | 1229           | 6.5%      | 8.4%               | 1353                    | 6.4%      | 8.4%               |
| Transferase (PC00220)                               | 54                 | 3.4%      | 4.9%               | 1051           | 5.5%      | 7.2%               | 1164                    | 5.6%      | 7.2%               |
| Oxidoreductase (PC00176)                            | 36                 | 2.3%      | 3.2%               | 577            | 3.0%      | 3.9%               | 597                     | 2.8%      | 3.8%               |
| Cell adhesion (PC00069)                             | 36                 | 2.3%      | 3.2%               | 434            | 2.3%      | 3.0%               | 492                     | 2.4%      | 3.0%               |
| Transfer/carrier (PC00219)                          | 30                 | 1.9%      | 2.7%               | 361            | 1.9%      | 2.5%               | 364                     | 1.8%      | 2.2%               |
| Cytoskeletal protein (PC00085)                      | 28                 | 1.8%      | 2.5%               | 667            | 3.5%      | 4.5%               | 778                     | 3.8%      | 4.8%               |
| Calcium-binding (PC00060)                           | 20                 | 1.3%      | 1.8%               | 367            | 1.9%      | 2.5%               | 390                     | 1.8%      | 2.4%               |
| Ligase (PC00142)                                    | 17                 | 1.1%      | 1.5%               | 343            | 1.8%      | 2.3%               | 372                     | 1.8%      | 2.4%               |
| Isomerase (PC00135)                                 | 10                 | 0.6%      | 0.9%               | 157            | 0.8%      | 1.1%               | 158                     | 0.8%      | 1.0%               |
| Lyase (PC00144)                                     | 9                  | 0.6%      | 0.8%               | 144            | 0.8%      | 1.0%               | 151                     | 0.8%      | 1.0%               |
| Membrane traffic (PC00150)                          | 5                  | 0.3%      | 0.5%               | 306            | 1.6%      | 2.1%               | 372                     | 1.8%      | 2.4%               |
| Cell junction protein (PC00070)                     | 5                  | 0.3%      | 0.5%               | 137            | 0.7%      | 0.9%               | 140                     | 0.6%      | 0.8%               |
| Storage protein (PC00210)                           | 5                  | 0.3%      | 0.5%               | 27             | 0.1%      | 0.2%               | 25                      | 0.2%      | 0.2%               |
| Extracellular matrix protein (PC00102)              | 4                  | 0.3%      | 0.4%               | 312            | 1.6%      | 2.1%               | 364                     | 1.8%      | 2.2%               |
| Chaperone (PC00072)                                 | 3                  | 0.2%      | 0.3%               | 152            | 0.8%      | 1.0%               | 183                     | 0.8%      | 1.2%               |
| Viral protein (PC00237)                             | 2                  | 0.1%      | 0.2%               | 10             | 0.1%      | 0.1%               | 16                      | 0.0%      | 0.0%               |
| Structural protein (PC00211)                        | 2                  | 0.1%      | 0.2%               | 141            | 0.7%      | 1.0%               | 166                     | 0.8%      | 1.0%               |
| Transmembrane receptor regulatory/adaptor (PC00226) | 1                  | 0.1%      | 0.1%               | 56             | 0.3%      | 0.4%               | 65                      | 0.4%      | 0.4%               |
| surfactant (PC00212)                                | 0                  | 0.0%      | 0.0%               | 5              | 0.0%      | 0.0%               | 8                       | 0.0%      | 0.0%               |
| Total genes                                         | 1567               |           |                    | 19171          |           |                    | 20972                   |           |                    |
| Total number protein class hits                     | 1109               |           |                    | 14773          |           |                    | 16115                   |           |                    |

**Supplementary Table 11: Comparison of repeat ages found within and outside of heterozygous SNP dense pass regions**

| Repeat category | GRCm38 genome-wide | Mean % divergence | Sample size (n) Within hSNP dense regions | Mean % divergence | n < 1% divergence | Sample size (n) Outside hSNP dense regions | Mean % divergence | n < 1% divergence | Difference in mean ages* |
|-----------------|--------------------|-------------------|-------------------------------------------|-------------------|-------------------|--------------------------------------------|-------------------|-------------------|--------------------------|
| LINES           | 625618             | 17.799            | 27076                                     | 15.377            | 623               | 599617                                     | 17.911            | 14545             | $2.2 \times 10^{-16}$    |
| LTRs            | 670986             | 20.155            | 29815                                     | 17.510            | 146               | 641890                                     | 20.297            | 2046              | $2.2 \times 10^{-16}$    |
| SINEs           | 1292649            | 21.118            | 29399                                     | 20.137            | 14                | 1263279                                    | 21.141            | 603               | $2.2 \times 10^{-16}$    |

\* Welch's two sample t-test that was used to compare the average ages of the repeats within and outside hSNP dense regions.

**Supplementary Table 12. Repeat enrichment analysis**

|                      | All age repeats analysed |                   |              | Young repeats (<1% seq divergence) |                   |              |
|----------------------|--------------------------|-------------------|--------------|------------------------------------|-------------------|--------------|
|                      | p-value                  | Total simulations | Mean content | p-value                            | Total simulations | Mean content |
| <b>LINES</b>         |                          |                   |              |                                    |                   |              |
| Over-representation  | $1 \times 10^{-7}$       | 1000000           | 22050.562    | 0.047                              | 1000000           | 577.835      |
| Under-representation | 1                        | 1000000           | 22050.562    | 0.957                              | 1000000           | 577.835      |
| <b>SINEs</b>         |                          |                   |              |                                    |                   |              |
| Over-representation  | 0.982057                 | 1000000           | 46200.103    | 0.971                              | 1000000           | 21.843       |
| Under-representation | 0.017943                 | 1000000           | 46200.103    | 0.049                              | 1000000           | 21.843       |
| <b>LTRs</b>          |                          |                   |              |                                    |                   |              |
| Over-representation  | $1 \times 10^{-7}$       | 1000000           | 22795.038    | $1 \times 10^{-7}$                 | 1000000           | 73.091       |
| Under-representation | 1                        | 1000000           | 22795.038    | 1                                  | 1000000           | 73.091       |

For over-representation, p-values are the fractions of simulated repeat content counts were equal to or more extreme than the observed repeat content in hSNP dense regions. For under-representation, p-values are the fraction of simulated repeat content counts were equal to or less extreme than the observed repeat content in hSNP dense regions

**Supplementary Table 13: Representation of novel CAST/EiJ *Olfr* alleles in *de novo* assembly**

| New alleles   | Length | Identity | Location | Start (bp) | End (bp)  | <i>De novo</i> assembly |
|---------------|--------|----------|----------|------------|-----------|-------------------------|
| Olfr1459_new  | 1088   | 100      | chr19    | 9961696    | 9962783   | Correct                 |
| Olfr1502_new  | 1386   | 100      | chr19    | 10772704   | 10773434  | Correct*                |
| Olfr1480_new  | 1076   | 100      | chr19    | 10425162   | 10423157  | Match with gaps         |
| Olfr1487_new  | 1009   | -        | -        | -          | -         | No good hit             |
| Olfr46_new    | 1063   | 99.9     | chr7     | 137512292  | 137513261 | Match with gaps         |
| Olfr643_new   | 1079   | 100      | chr7     | 98952738   | 98955250  | Match with gaps         |
| Olfr393_new   | 1049   | 98       | chr11    | 73912427   | 73913454  | Match with gaps         |
| Olfr566_CAST  | 1030   | 100      | chr7     | 97630898   | 97630781  | Partial sequence        |
| Olfr585_CAST  | 1135   | 100      | chr7     | 97879663   | 97876532  | Partial sequence        |
| Olfr498_CAST  | 1113   | 100      | chr7     | 103389301  | 103391680 | Partial sequence        |
| Olfr209_new   | 1081   | 100      | chr16    | 58382240   | 58382512  | Partial sequence        |
| Olfr1151_new  | 1163   | 100      | chr2     | 88767581   | 88776837  | Partial sequence        |
| Olfr1152_new  | 1031   | 100      | chr2     | 88774256   | 88774754  | Partial sequence        |
| Olfr507_new   | 1096   | 100      | chr7     | 103622238  | 103623333 | Correct                 |
| Olfr635_new   | 1032   | 100      | chr7     | 98852030   | 98852464  | Partial sequence        |
| Olfr911_new   | 1005   | 99.9     | chr9     | 36511467   | 36512471  | Correct                 |
| Olfr467_new   | 967    | 100      | chr7     | 102812359  | 102812210 | Correct                 |
| Olfr661_new   | 653    | 100      | chr7     | 99656716   | 99657335  | Correct                 |
| Olfr525_new   | 1054   | 100      | chr7     | 137367392  | 137366339 | Correct                 |
| Olfr384_new   | 1075   | 100      | chr11    | 74001578   | 74003037  | Match with gaps         |
| Olfr394_new   | 998    | 98       | chr11    | 74206283   | 74207267  | Match with gaps         |
| Olfr646_new   | 1027   | 99.71    | chr7     | 99026945   | 99027973  | Match with gaps         |
| Olfr1333_new  | 1220   | 99.41    | chr4     | 116638873  | 116639881 | Match with gaps         |
| Olfr285_new   | 1013   | 99.9     | chr15    | 99936591   | 99937603  | Match with gaps         |
| Olfr1331_new  | 1071   | 100      | chr4     | 116598198  | 116597128 | Correct                 |
| Olfr747_CAST  | 894    | 100      | chr14    | 41807383   | 41808366  | Correct                 |
| Olfr212_new   | 881    | 97.39    | chr6     | 118114492  | 118115372 | Match with gaps         |
| Olfr1402_new1 | 1075   | -        | -        | -          | -         | No good hit             |
| Olfr1402_new2 | 1103   | 100      | chr3     | 97033490   | 97034565  | Partial sequence        |

\* Transposon element insertion disrupts the sequence, so the gene is truncated.

Twenty nine new olfactory receptors or strain specific *olfr* alleles were reported in mouse strain CAST/EiJ in previous study. 27 out of 29 were fully or partially assembled in *de novo* assembly (final column).

**Supplementary Table 14: GENCODE reference annotation updates**

| <b>GRCm38, Chr1 to Chr12, manually corrected</b> |            |                        |               |
|--------------------------------------------------|------------|------------------------|---------------|
| <b>Annotation decision</b>                       |            | <b>Biotype</b>         | <b>Number</b> |
| Annotated new locus                              | <b>62</b>  | Protein coding         | 19            |
|                                                  |            | lncRNA                 | 37            |
|                                                  |            | Pseudogene             | 6             |
| Annotated updated annotation                     | <b>272</b> | new coding transcript  | 105           |
|                                                  |            | new transcript         | 31            |
|                                                  |            | new NMD transcript     | 6             |
|                                                  |            | other                  | 130           |
| Rejected                                         | <b>451</b> | already annotated      | 231           |
|                                                  |            | would not be annotated | 185           |
|                                                  |            | genomic sequence error | 34            |
|                                                  |            | pseudogene             | 1             |
|                                                  |            | <b>Total</b>           | <b>785</b>    |

**GRCm38, Chr13 to Chr19, and ChrX**

| <b>Annotation decision</b>   |           | <b>Biotype</b>         | <b>Number</b> |
|------------------------------|-----------|------------------------|---------------|
| Annotated new locus          | <b>36</b> | Protein coding         | 15            |
|                              |           | lncRNA                 | 15            |
|                              |           | Pseudogene             | 6             |
| Annotated updated annotation | <b>13</b> | new coding transcript  | 0             |
|                              |           | new transcript         | 3             |
|                              |           | new NMD transcript     | 2             |
|                              |           | other                  | 8             |
| Rejected                     | <b>20</b> | already annotated      | 2             |
|                              |           | genomic sequence error | 7             |
|                              |           | would not be annotated | 11            |
|                              |           | <b>Total</b>           | <b>69</b>     |
|                              |           | Total Annotated        | 383           |
|                              |           | Total Rejected         | 471           |
|                              |           | <b>Grand Total</b>     | <b>854</b>    |

**Supplementary Table 15: Description of the 40 neuroanatomical parameters**

| Region ID | Parameter       | Description                                                      | Unit            |
|-----------|-----------------|------------------------------------------------------------------|-----------------|
| 1         | 4_TB_area       | Total brain area                                                 | cm <sup>2</sup> |
|           | 4_TB_width      | Width of the total brain                                         | cm              |
|           | 4_TB_height_CS1 | Height of the total brain at CS1 (coronal critical section 1)    | cm              |
|           | 4_TB_height_CS2 | Height of the total brain at CS2 (coronal critical section 2)    | cm              |
| 2         | 4_TCTX_area     | Total cortical area                                              | cm <sup>2</sup> |
|           | 4_M2_length     | Length of the secondary motor cortex                             | cm              |
|           | 4_M1_length     | Length of the primary motor cortex                               | cm              |
| 3         | 4_Pons_height   | Height of the pons                                               | cm              |
| 4         | 4_TC_area       | Total cerebellar area                                            | cm <sup>2</sup> |
|           | 4_IGL_area      | Area of the internal granular layer of the cerebellum            | cm <sup>2</sup> |
|           | 4_Folia         | Number of folia                                                  | digit           |
|           | 4_Med_area      | Area of the medial cerebellar nucleus                            | cm <sup>2</sup> |
| 5         | 4_LV_area       | Lateral ventricle area                                           | cm <sup>2</sup> |
| 6         | 4_cc_area       | Corpus callosum area                                             | cm <sup>2</sup> |
|           | 4_cc_length     | Total outer length of the corpus callosum                        | cm              |
|           | 4_cc_height     | Corpus callosum thickness                                        | cm              |
| 7         | 4_TTh_area      | Total thalamic area                                              | cm <sup>2</sup> |
| 8         | 4_CPu_area      | Caudate putamen area                                             | cm <sup>2</sup> |
| 9         | 4_HP_area       | Hippocampus area                                                 | cm <sup>2</sup> |
|           | 4_Rad_length    | Length of the radiatum layer of the hippocampus                  | cm              |
|           | 4_Or_length     | Length of the oriens layer of the hippocampus                    | cm              |
|           | 4_TILpy_area    | Area of pyramidal cells of the hippocampus                       | cm <sup>2</sup> |
|           | 4_TILpy_length  | Total internal length of pyramidal cell layer of the hippocampus | cm              |
|           | 4_Mol_length    | Length of the molecular layer of the hippocampus                 | cm              |
|           | 4_DG_area       | Dentate gyrus area                                               | cm <sup>2</sup> |
|           | 4_DG_length     | Dentate gyrus length                                             | cm              |
| 10        | 4_fi_area       | Area of the fimbria of the hippocampus                           | cm <sup>2</sup> |
| 11        | 4_aca_area      | Anterior commissure area                                         | cm <sup>2</sup> |
| 12        | 4_sm_area       | Stria medullaris area                                            | cm <sup>2</sup> |
| 13        | 4_f_area        | Fornix area                                                      | cm <sup>2</sup> |
| 14        | 4_och_area      | Optic chiasm area                                                | cm <sup>2</sup> |
| 15        | 4_VMHvl_area    | Area of ventromedial nucleus of the hypothalamus                 | cm <sup>2</sup> |
| 16        | 4_Pn_area       | Pontine nuclei area                                              | cm <sup>2</sup> |
| 17        | 4_SN_area       | Substantia nigra area                                            | cm <sup>2</sup> |
| 18        | 4_fp_area       | Area of fibre of pons                                            | cm <sup>2</sup> |
| 19        | 4_Cg_area       | Cingulate cortex area                                            | cm <sup>2</sup> |
|           | 4_Cg_height     | Height of the cingulate cortex                                   | cm              |
| 20        | 4_DS_area       | Dorsal subiculum area                                            | cm <sup>2</sup> |
| 21        | 4_InfC_area     | Inferior colliculus area                                         | cm <sup>2</sup> |
| 22        | 4_SupC_area     | Superior colliculus area                                         | cm <sup>2</sup> |

**Supplementary Table 16: Mouse Efcab3<sup>-/-</sup> full raw neuroanatomical data**

| Sex             | Male        | Male        | Male      | Male                  | Male                  | Male                  |
|-----------------|-------------|-------------|-----------|-----------------------|-----------------------|-----------------------|
| Barcode         | M02574294   | M02564646   | M02567678 | M02568046             | M02568047             | M02568056             |
| Genotype        | WT          | WT          | WT        | Efcab3 <sup>-/-</sup> | Efcab3 <sup>-/-</sup> | Efcab3 <sup>-/-</sup> |
| Age             | 16 weeks    | 16 weeks    | 16 weeks  | 16 weeks              | 16 weeks              | 16 weeks              |
| 4_TB_area       | 0.394839062 | 0.3893      | 0.3917    | 0.4138                | 0.427                 | 0.4122                |
| 4_TB_width      | 0.681202975 | 0.6505      | 0.6822    | 0.6756                | 0.6641                | 0.6739                |
| 4_TB_height_CS1 | 0.557927685 | 0.5561      | 0.5498    | 0.5588                | 0.5642                | 0.5408                |
| 4_TB_height_CS2 | 0.601141271 | 0.6136      | 0.6022    | 0.6336                | 0.6647                | 0.6248                |
| 4_TCTX_area     | 0.03961     | 0.03494     | 0.0377    | 0.03909               | 0.03831               | 0.03848               |
| 4_M2_length     | 0.145630557 | 0.1142      | 0.1476    | 0.1405                | 0.1175                | 0.1426                |
| 4_M1_length     | 0.133662337 | 0.1339      | 0.1476    | 0.1457                | 0.1423                | 0.1293                |
| 4_Pons_height   | 0.234887096 | 0.2707      | 0.2523    | 0.2669                | 0.2605                | 0.2597                |
| 4_TC_area       |             | 0.06805     | 0.06007   | 0.08621               | 0.07759               | 0.08043               |
| 4_IGL_area      | 0.034195211 | 0.03554     | 0.02742   | 0.0429                | 0.04203               | 0.03464               |
| 4_Folia         | 8           | 8           | 8         | 8                     | 8                     | 8                     |
| 4_Med_area      |             | 0.003572    | 0.004626  | 0.0004613             | 0.00185               | 0.002456              |
| 4_LV_area       | 0.009947616 | 0.012605403 | 0.008081  | 0.01631               | 0.01728               | 0.01707               |
| 4_cc_area       | 0.012429953 | 0.013       | 0.01379   | 0.01222               | 0.0143                | 0.01348               |
| 4_cc_length     | 0.554432276 | 0.5767      | 0.592     | 0.5935                | 0.6515                | 0.6591                |
| 4_cc_height     | 0.018583466 | 0.02268     | 0.0198    | 0.02261               | 0.02451               | 0.02145               |
| 4_TTh_area      | 0.035233709 | 0.03687     | 0.03318   | 0.04147               | 0.04305               | 0.04041               |
| 4_CPu_area      | 0.0002768   | 0.002947    |           |                       | 0.0006813             | 0.003032              |
| 4_HP_area       | 0.018596528 | 0.02175     | 0.02002   | 0.01932               | 0.02344               | 0.02232               |
| 4_Rad_length    | 0.02904     | 0.03097     | 0.03143   | 0.02583               | 0.0384                | 0.03061               |
| 4_Or_length     | 0.012538119 | 0.01302     | 0.01243   | 0.01441               | 0.01618               | 0.01241               |
| 4_TILpy_area    | 0.00200652  | 0.001708    | 0.001784  | 0.001699              | 0.002092              | 0.002098              |
| 4_TILpy_length  | 0.208773608 | 0.214       | 0.2116    | 0.2299                | 0.2716                | 0.2311                |
| 4_Mol_length    | 0.012571168 | 0.01558     | 0.01312   | 0.01298               | 0.01713               | 0.01421               |
| 4_DG_area       | 0.002233363 | 0.00185     | 0.001854  | 0.001788              | 0.001897              | 0.001982              |
| 4_DG_length     | 0.204909557 | 0.2048      | 0.1845    | 0.1866                | 0.2202                | 0.2044                |
| 4_fi_area       | 0.005504016 | 0.005991    | 0.005328  | 0.005189              | 0.005061              | 0.005331              |
| 4_aca_area      |             | 0.00166     |           | 0.001458              | 0.001703              | 0.001441              |
| 4_sm_area       | 0.00164858  | 0.00115     | 0.004514  | 0.001472              | 0.0009963             | 0.001267              |
| 4_f_area        | 0.00130731  |             |           | 0.00094               | 0.001026              | 0.001155              |
| 4_och_area      | 0.000786433 | 0.0008198   | 0.000763  | 0.0007356             | 0.001022              | 0.0009324             |
| 4_VMHvl_area    |             |             |           | 0.002336              | 0.002719              | 0.00259               |
| 4_Pn_area       |             | 0.002329    | 0.002318  | 0.003424              | 0.003266              | 0.003213              |
| 4_SN_area       |             | 0.003378    | 0.002189  | 0.002665              | 0.002383              |                       |
| 4_fp_area       |             | 0.002418    | 0.003039  | 0.00348               | 0.002925              | 0.002876              |
| 4_Cg_area       | 0.004525    | 0.005272    | 0.007008  | 0.007478              | 0.006565              | 0.005457              |
| 4_Cg_height     | 0.07979959  | 0.07215     | 0.07297   | 0.08927               | 0.1197                | 0.07743               |
| 4_DS_area       | 0.0008697   | 0.001135    | 0.0008985 | 0.0008761             | 0.001505              | 0.0008949             |
| 4_InfC_area     |             | 0.01167     | 0.01083   | 0.006489              | 0.0126                | 0.01076               |
| 4_SupC_area     |             | 0.05302     | 0.05447   | 0.05629               | 0.05585               | 0.05189               |

**Supplementary Table 17: Identifiers for the mice sequenced in this study**

| <b>Strain</b> | <b>Jax stock no.</b> | <b>Generation of sequenced animal</b> | <b>Date of birth</b> |
|---------------|----------------------|---------------------------------------|----------------------|
| C57BL/6NJ     | 005304               | ?+F8                                  | 3/1/08               |
| FVB/NJ        | 001800               | F95pF98                               |                      |
| A/J           | 000646               | F280                                  | 6/6/08               |
| AKR/J         | 000648               | F256                                  | 6/3/08               |
| BALB/cJ       | 000651               | F226                                  | 7/30/08              |
| C3H/HeJ       | 000659               | F258pF262                             | 7/31/08              |
| CBA/J         | 000656               | F275                                  | 7/27/08              |
| CAST/EiJ      | 000928               | F90pF93                               | 6/8/08               |
| DBA/2J        | 000671               | F219pF224                             | 6/10/08              |
| LP/J          | 000676               | F195                                  | 6/5/08               |
| NOD/ShiLtJ    | 001976               | F117pF121                             | 6/18/08              |
| NZO/HILtJ     | 002105               | ?+F41                                 | 5/20/08              |
| PWK/PhJ       | 004660               | F69+3+17                              | 6/1/08               |
| SPRET/EiJ     | 001146               | F78                                   | 2/25/08              |
| WSB/EiJ       | 001145               | ?+F4                                  | 5/17/08              |
| 129S1/SvImJ   | 002448               | F63pF65                               | 6/29/08              |



**Supplementary Table 18: SGA de novo assembly parameters.**

| <b>SGA step</b>                                    | <b>Parameters</b>                     |
|----------------------------------------------------|---------------------------------------|
| preprocess (preprocess fastq files)                | --pe-mode 1                           |
| index (index preprocessed data)                    | -a ropebwt --no-reverse               |
| correct (error correction on preprocessed data)    | -k 55 --learn                         |
| index (index error-corrected data)                 | -a ropebwt                            |
| filter (filter error-corrected data)               | --low-complexity-check -x 2 -r 256    |
| fm-merge (merge reads)                             | -m 65                                 |
| index (index FM-merged reads)                      | -d 5000000                            |
| overlap (construct string graph)                   | -m 65                                 |
| assemble (contig assembly)                         | -m 77 -d 0.4 -g 0.1 -r 10 -l 200      |
| FilterFasta.pl (remove small contigs)              | -n 200                                |
| bwa index (index filtered contigs)                 | -a bwtsv                              |
| sga-align (align reads to contigs)                 | N/A                                   |
| samtools merge (merge refsorted and unsorted BAMs) | N/A                                   |
| sga-astat.py (make astat file from refsor BAM)     | -m 200                                |
| sga-bam2de.pl (insert size distance estimates)     | --prefix pe -n 5 -m 200               |
| scaffold (build scaffolds)                         | -u 25 -m 200                          |
| scaffold2fasta (convert to fasta file)             | --write-unplaced -m 200 --use-overlap |

SGA version 0.9.43

bwa version 0.5.9

samtools version 0.1.18-r572

Supplementary Table 19: SOAP scaffolding parameters.

| Strain             | Paired-end        |                     |      | 3kb mate-pair     |                     |      | 6kb mate-pair     |                     |      | 10kb mate-pair    |                     |      | 40Kb fosmid ends  |                     |      | BAC-ends 120kb    |                     |      |
|--------------------|-------------------|---------------------|------|-------------------|---------------------|------|-------------------|---------------------|------|-------------------|---------------------|------|-------------------|---------------------|------|-------------------|---------------------|------|
|                    | Average insertion | Pair-number cut off | Rank | Average insertion | Pair-number cut off | Rank | Average insertion | Pair-number cut off | Rank | Average insertion | Pair-number cut off | Rank | Average insertion | Pair-number cut off | Rank | Average insertion | Pair-number cut off | Rank |
| <b>129S1/SvImJ</b> | 350               | 15                  | 1    | 2200              | 6                   | 2    | 5000              | 11                  | 3    | 13500             | 23                  | 4    |                   |                     |      |                   |                     |      |
| <b>A/J</b>         | 350               | 15                  | 1    | 2300              | 7                   | 2    | 5000              | 15                  | 3    | 13000             | 28                  | 4    | 35000             | 5                   | 5    |                   |                     |      |
| <b>AKR/J</b>       | 350               | 15                  | 1    | 4200              | 6                   | 2    | 5000              | 11                  | 3    | 13000             | 18                  | 4    | 35000             | 5                   | 5    |                   |                     |      |
| <b>BALB/cJ</b>     | 350               | 15                  | 1    | 2500              | 5                   | 2    | 5000              | 15                  | 3    | 8000              | 32                  | 4    | 35000             | 5                   | 5    |                   |                     |      |
| <b>C3H/HeJ</b>     | 350               | 15                  | 1    | 2500              | 5                   | 2    | 5000              | 13                  | 3    | 11000             | 15                  | 4    | 35000             | 5                   | 5    |                   |                     |      |
| <b>C57BL/6NJ</b>   | 350               | 15                  | 1    | 4000              | 8                   | 2    | 5000              | 13                  | 3    | 14000             | 22                  | 4    | 35000             | 6                   | 5    |                   |                     |      |
| <b>CAST/EiJ</b>    | 350               | 15                  | 1    | 2500              | 8                   | 2    | 4800              | 13                  | 3    | 13000             | 15                  | 4    |                   |                     |      |                   |                     |      |
| <b>CBA/J</b>       | 350               | 15                  | 1    | 2600              | 4                   | 2    | 4800              | 11                  | 3    | 13500             | 14                  | 4    | 35000             | 5                   | 5    |                   |                     |      |
| <b>DBA/2J</b>      | 350               | 15                  | 1    | 2600              | 8                   | 2    | 5000              | 16                  | 3    | 6000              | 5                   | 4    | 35000             | 11                  | 5    |                   |                     |      |
| <b>FVB/NJ</b>      | 350               | 15                  | 1    | 2600              | 7                   | 2    | 5000              | 17                  | 3    | 6000              | 8                   | 4    |                   |                     |      |                   |                     |      |
| <b>LP/J</b>        | 350               | 15                  | 1    | 2500              | 10                  | 2    | 5200              | 12                  | 3    | 15000             | 15                  | 4    | 35000             | 7                   | 5    |                   |                     |      |
| <b>NOD/ShiLtJ</b>  | 350               | 15                  | 1    | 2500              | 13                  | 2    | 5200              | 40                  | 3    | 12500             | 26                  | 4    |                   |                     |      | 200000            | 5                   | 5    |
| <b>NZO/HILtJ</b>   | 350               | 15                  | 1    | 2600              | 5                   | 2    | 5000              | 13                  | 3    | 12000             | 31                  | 4    |                   |                     |      |                   |                     |      |
| <b>PWK/PhJ</b>     | 350               | 15                  | 1    | 4000              | 6                   | 2    | 5000              | 12                  | 3    | 6000              | 5                   | 4    |                   |                     |      |                   |                     |      |
| <b>SPRET/EiJ</b>   | 350               | 15                  | 1    | 2500              | 6                   | 2    | 5000              | 11                  | 3    | 12000             | 15                  | 4    |                   |                     |      |                   |                     |      |
| <b>WSB/EiJ</b>     | 350               | 15                  | 1    | 2600              | 14                  | 2    | 5000              | 14                  | 3    | 14000             | 38                  | 4    |                   |                     |      |                   |                     |      |

**Supplementary Table 20: Scaffold break parameters**

|             | <b>10kb minimum</b> | <b>40kb minimum</b> |
|-------------|---------------------|---------------------|
| 129S1/SvImJ | 21                  |                     |
| A/J         | 25                  | 4                   |
| AKR/J       | 15                  | 4                   |
| BALB/cJ     | 28                  | 4                   |
| C3H/HeJ     | 13                  | 4                   |
| C57BL/6NJ   | 19                  | 5                   |
| CAST/EiJ    | 13                  |                     |
| CBA/J       | 12                  | 4                   |
| DBA/2J      | 5                   | 10                  |
| FVB/NJ      | 7                   |                     |
| LP/J        | 13                  | 6                   |
| NOD/ShiLtJ  | 24                  |                     |
| NZO/HILtJ   | 28                  |                     |
| PWK/PhJ     | 5                   |                     |
| SPRET/EiJ   | 13                  |                     |
| WSB/EiJ     | 34                  |                     |

**Supplementary table 21: Pairs of flanking gRNAs used for the Efcab3-like CRISPR deletion including WGE IDs (<https://www.sanger.ac.uk/htgt/wge/>).**

| <b>Location</b> | <b>WGE ID</b> | <b>Primer sequence</b>  |
|-----------------|---------------|-------------------------|
| 5' forward      | 343966999     | GAATTTGGAGCACATGCCTGTGG |
| 5' reverse      | 343967008     | TCAAGGCTAGTCTGACTACGTGG |
| 3' forward      | 343967088     | TGAGCCTATGCAGGTCACACTGG |
| 3' reverse      | 343967105     | CTGATAGACGTGAGAATTTGAGG |

**Supplementary Table 22: Genome Assembly Submissions**

| <b>BioProject</b> | <b>BioSample</b> | <b>Accession</b> | <b>Strain</b> | <b>Jax code</b> |
|-------------------|------------------|------------------|---------------|-----------------|
| PRJNA310854       | SAMN04489811     | LVXH00000000     | 129S1/SvImJ   | 2448            |
| PRJNA310854       | SAMN04489813     | LVXI00000000     | A/J           | 646             |
| PRJNA310854       | SAMN04489815     | LVXJ00000000     | AKR/J         | 648             |
| PRJNA310854       | SAMN04489816     | LVXK00000000     | BALB/cJ       | 651             |
| PRJNA310854       | SAMN04489818     | LVXL00000000     | C3H/HeJ       | 659             |
| PRJNA310854       | SAMN04489821     | LVXM00000000     | C57BL/6NJ     | 5304            |
| PRJNA310854       | SAMN04489822     | LVXN00000000     | CAST/EiJ      | 928             |
| PRJNA310854       | SAMN04489823     | LVXO00000000     | CBA/J         | 656             |
| PRJNA310854       | SAMN04489824     | LVXP00000000     | DBA/2J        | 671             |
| PRJNA310854       | SAMN04489825     | LVXQ00000000     | FVB/NJ        | 1800            |
| PRJNA310854       | SAMN04489826     | LVXR00000000     | LP/J          | 676             |
| PRJNA310854       | SAMN04489827     | LVXS00000000     | NOD/ShiLtJ    | 1976            |
| PRJNA310854       | SAMN04489828     | LVXT00000000     | NZO/HiLtJ     | 2105            |
| PRJNA310854       | SAMN04489829     | LVXU00000000     | PWK/PhJ       | 3715            |
| PRJNA310854       | SAMN04489830     | LVXV00000000     | SPRET/EiJ     | 1145            |
| PRJNA310854       | SAMN04489831     | LVXW00000000     | WSB/EiJ       | 1146            |

**Supplementary Table 23: Accession codes for read sequencing data used for genome assemblies, and consensus sequences for immunity loci.**

| Strain      | Illumina reads                      |           |           |           | Fosmid ends            | Dovetail  | Whole genome PacBio | Reassembly |          |          |
|-------------|-------------------------------------|-----------|-----------|-----------|------------------------|-----------|---------------------|------------|----------|----------|
|             | 400bp                               | 3kbp      | 6kbp      | 10kbp     |                        |           |                     | IRG        | Nlrp1    | Sfn      |
| 129S1/SvImJ | ERS076385                           | ERS012249 | ERS160570 | ERS349316 |                        |           |                     |            |          |          |
| AKR/J       | ERS075418<br>ERS212196<br>ERS154382 | ERS012255 | ERS160571 | ERS361114 |                        |           |                     |            |          |          |
| A/J         | ERS075416<br>ERS138733<br>ERS212195 | ERS126509 | ERS160572 | ERS361111 |                        |           |                     |            |          |          |
| BALB/cJ     | ERS076386                           | ERS012260 | ERS160573 | ERS349279 |                        |           |                     |            |          |          |
| C3H/HeJ     | ERS076383                           | ERS012262 | ERS160574 | ERS349280 | ERS180302<br>ERS180306 |           |                     |            |          |          |
| C57BL/6NJ   | ERS076384                           | ERS126512 | ERS160575 | ERS349310 | ERS180304<br>ERS180303 |           |                     |            |          |          |
| CAST/EiJ    | ERS076381                           | ERS012267 | ERS160576 | ERS361113 |                        | ERS745821 | ERS636080           |            | LT629147 | LT629148 |
| CBA/J       | ERS076379                           | ERS012268 | ERS160577 | ERS349312 |                        |           |                     |            |          |          |
| DBA/2J      | ERS075663                           | ERS012271 | ERS160578 | ERS361112 | ERS234606<br>ERS234607 |           |                     |            |          |          |
| FVB/NJ      | ERP000687                           | ERS126515 | ERS160585 | ERS349309 |                        |           |                     |            |          |          |
| LP/J        | ERS076382                           | ERS012273 | ERS160579 | ERS349315 | ERS234608<br>ERS234609 |           |                     |            |          |          |
| NOD/ShiLtJ  | ERS076389                           | ERS126513 | ERS160580 | ERS349281 |                        |           |                     |            |          |          |
| NZO/HILtJ   | ERS076387                           | ERS012274 | ERS160581 | ERS349282 |                        |           |                     |            |          |          |
| PWK/PhJ     | ERS076378                           | ERS126511 | ERS160582 | ERS349311 |                        | ERS745822 | ERS559170           | LT629149   | LT629150 | LT629151 |
| SPRET/EiJ   | ERS076388<br>ERS138732              | ERS126510 | ERS160583 | ERS349314 |                        | ERS745823 | ERS636081           |            |          |          |
| WSB/EiJ     | ERS076380                           | ERS126514 | ERS160584 | ERS349313 |                        |           |                     | LT629152   | LT629153 | LT629154 |

**Supplementary Table 24: BioNano genome maps summary**

|             | Map count | Min length (Mb) | Median length (Mb) | Mean length (Mb) | N50 length (Mb) | Max length (Mb) | total length (Mb) | Mean length between labels (bp) | Median length between labels |
|-------------|-----------|-----------------|--------------------|------------------|-----------------|-----------------|-------------------|---------------------------------|------------------------------|
| 129S1/SvImJ | 3220      | 0.051           | 0.606              | 0.796            | 1.05            | 6.306           | 2564.703          | 7,463.49                        | 5,692.80                     |
| A/J         | 2403      | 0.106           | 0.773              | 1.053            | 1.454           | 7.081           | 2531.241          | 7,735.42                        | 5,905.90                     |
| AKR/J       | 5164      | 0.085           | 0.4                | 0.477            | 0.55            | 2.539           | 2461.811          | 7,550.62                        | 5,818.25                     |
| BALB/cJ     | 3617      | 0.089           | 0.548              | 0.712            | 0.909           | 6.005           | 2574.398          | 7,496.68                        | 5,740.20                     |
| C3H/HeJ     | 2559      | 0.083           | 0.779              | 1.008            | 1.345           | 8.842           | 2579.082          | 7,672.16                        | 5,869                        |
| C7BL/6NJ    | 4428      | 0.054           | 0.467              | 0.573            | 0.694           | 3.437           | 2537.999          | 7,966.23                        | 6,188.20                     |
| CAST/EiJ    | 2659      | 0.131           | 0.723              | 0.968            | 1.386           | 9.856           | 2574.823          | 7,610.07                        | 5,813.30                     |
| CBA/J       | 3048      | 0.103           | 0.62               | 0.793            | 1.031           | 4.682           | 2417.411          | 7,774.18                        | 6,087.80                     |
| DBA/2J      | 2929      | 0.082           | 0.647              | 0.859            | 1.174           | 5.893           | 2515.869          | 7,489.16                        | 5,761.70                     |
| FVB/NJ      | 2767      | 0.077           | 0.684              | 0.94             | 1.353           | 7.552           | 2602.332          | 7,748.98                        | 5,926.40                     |
| NOD/ShiLtJ  | 3079      | 0.19            | 0.649              | 0.816            | 1.009           | 4.001           | 2512.108          | 7,594.36                        | 5,773.90                     |
| NZO/HiLtJ   | 2510      | 0.153           | 0.75               | 1.029            | 1.455           | 8.51            | 2583.715          | 7,634.20                        | 5,858                        |
| PWK/PhJ     | 4520      | 0.082           | 0.452              | 0.559            | 0.675           | 4.22            | 2524.735          | 7,352.23                        | 5,634.80                     |
| SPRET/EiJ   | 3465      | 0.097           | 0.593              | 0.725            | 0.852           | 6.804           | 2511.936          | 8,176.41                        | 6,354.10                     |
| WSB/EiJ     | 3076      | 0.08            | 0.627              | 0.785            | 0.952           | 4.903           | 2414.256          | 7,969.92                        | 6,179.40                     |
| LP/J        | 2999      | 0.121           | 0.638              | 0.911            | 1.303           | 8.126           | 2732.569          | 8,100.62                        | 6,214.60                     |

**Supplementary Table 25: Summary of the pseudogene annotation in mouse strains**

| <b>Strain</b>      | <b>Total</b> | <b>Level 1</b> | <b>Level 2</b> | <b>Level 3</b> | <b>Processed</b> | <b>Duplicated</b> | <b>Other</b> |
|--------------------|--------------|----------------|----------------|----------------|------------------|-------------------|--------------|
| <b>129S1/SvImJ</b> | 12827        | 5284           | 1042           | 6501           | 10616            | 1591              | 620          |
| <b>A/J</b>         | 12740        | 5295           | 997            | 6448           | 10684            | 1417              | 639          |
| <b>AKR/J</b>       | 12914        | 5289           | 996            | 6629           | 10791            | 1496              | 627          |
| <b>BALB/cJ</b>     | 13011        | 5344           | 939            | 6728           | 10786            | 1598              | 627          |
| <b>C3H/HeJ</b>     | 12736        | 5201           | 917            | 6618           | 10665            | 1455              | 616          |
| <b>C57BL/6NJ</b>   | 13205        | 5615           | 993            | 6597           | 10859            | 1661              | 685          |
| <b>CAST/EiJ</b>    | 12404        | 4694           | 1003           | 6707           | 10216            | 1549              | 639          |
| <b>CBA/J</b>       | 12842        | 5231           | 898            | 6713           | 10710            | 1494              | 638          |
| <b>DBA/2J</b>      | 12409        | 5282           | 908            | 6219           | 10451            | 1335              | 623          |
| <b>FVB/NJ</b>      | 12694        | 5257           | 977            | 6460           | 10652            | 1430              | 612          |
| <b>LP/J</b>        | 12688        | 5199           | 1015           | 6474           | 10626            | 1418              | 644          |
| <b>NOD/ShiLtJ</b>  | 12954        | 5285           | 937            | 6732           | 10725            | 1589              | 640          |
| <b>NZO/HILtJ</b>   | 12877        | 5592           | 1048           | 6237           | 10762            | 1465              | 650          |
| <b>PWK/PhJ</b>     | 12163        | 4630           | 865            | 6668           | 10294            | 1325              | 544          |
| <b>SPRET/EiJ</b>   | 11935        | 4444           | 980            | 6511           | 10137            | 1242              | 556          |
| <b>WSB/EiJ</b>     | 12102        | 4869           | 873            | 6360           | 10168            | 1336              | 598          |



**Supplementary Table 26: Long range PCR for PWK Nlrp1**

| External 5' primer    | External 3' primer    | internal 5' primer    | internal 3' primer    | predicted size(bp) | PCR product size(bp) | Repeat elements (%) |
|-----------------------|-----------------------|-----------------------|-----------------------|--------------------|----------------------|---------------------|
| CTTCCAAGTGGCATTAGTGAT | ACATCTGCCATCTCCTACATT | GATGGGCTTCTATCTACCTGA | CGGGAATCTAGTATTGCATGA | ~2Kb               | 1988                 | 58%                 |
| TGCCATGTAAGAAGATAGTTG | GGTGTATGGCTTCATTCATAG | AAGGAGCCAAGTTGATAACC  | TTCAAAAGCTACATCGCTAAA | ~3Kb               | 3567                 | Off target PCR      |
| CGCCAACCCACATACCT     | CTCATTGGGAGAACCTATTCA | GTGCCCAATCCTGATAGC    | CAAGAATTGGATAGCCCTAGA | ~10Kb              | 10620                | 88%                 |
| TACTGCCAGAACTTGACAAC  | GCCTGGAGCCAATACCT     | TGCCAGAACTTGACAACC    | GAGCCAATACCTAGACGAGAC | ~3Kb               | 3716                 | 70%                 |
| GCCTTACAGAGATATTGCAC  | GAGAAGACAGCCAACACTTTT | CCTTACAGAGATATTGCAC   | ACTGTTTCCTAATAATCTGAG | ~2Kb               | No product           | -                   |
| AGCAGGCCAATACTTATCATC | GAGTGGCCAGTGGGTTAT    | TACATGCTAGTTGTCCGAAGT | GGCCAGTGGGTTATCAGT    | ~9Kb               | 12267                | 90%                 |
| GGGCAGGTATTGTGTTAATCT | GTCCTTCCTTATGGCATTAGA | GGGCAGGTATTGTGTTAATCT | GTCCTTCCTTATGGCATTAGA | ~6Kb               | No product           | -                   |
| AGCCCAGTGTGTCATATCTAC | TGCCCTTACTCGGTCA      | AGCCCAGTGTGTCATATCTAC | CTGCCCTTACTCGGTC      | ~10Kb              | 4863                 | Off target PCR      |
| AGGACTTTGGGAGCAGTAAGA | AGAGATGCGTCCTGCTAAAC  | AGGACTTTGGGAGCAGTAAGA | GAGATGCGTCCTGCTAAACA  | ~2Kb               | 2155                 | 48%                 |
| GAGGAAGTAAACCGGACCA   | TTCAGTCAGATAACGGCACAT | AAACCGGACCAGCTACTTGTA | TCTGGGCTCTGTGTCTAAGG  | ~5Kb               | 6559                 | Off target PCR      |
| TACACACCGGTGCATAACTGG | TTTCAAGAACACGGGATGG   | ACACCGGTGCATAACTGGC   | GAACACGGGATGGTCCTAGAA | ~10Kb              | 5731                 | 79%                 |
| GGCCTGCTGTAGTGATT     | TAACAGCCTCTCAGAGACTAT | GGCCTGCTGTAGTGATT     | CAGCCTCTCAGAGACTATCAG | ~2Kb               | 1480                 | 89%                 |
